# Supplementary material for: Animal Functional Magnetic Resonance Imaging: Trends and Path Toward Standardization
Source: Front Neuroinform. 2020 Jan 22;13:78. doi: 10.3389/fninf.2019.00078 (PMC6987455; doi:10.3389/fninf.2019.00078)
Supplement: Supplementary file 1 [file Table_1.XLSX]

## Sheet: Frontier_review_old(1)
Timestamp	MS ID	Animal	Sample size	Animal prep	Anesthesia	Field strength	RF coil	fMRI sequence	fMRI contrast	Software	Study design	Template	Analysis	Statistics	Relevant	Data sharing	Gender
2019-12-03 08:52:34	1	Mouse other	34	Anesthesia ventilated	Halothane	7T	Lab-made	RARE	CBV	FSL	Pharma fMRI, Dreadd fMRI	Lab-made	GLM, ROI	Parametric
2019-12-03 09:55:04	2	Rat Sprague	24	Anesthesia ventilated	Î±-chloralose	11.7T, 14T or more		GE-EPI, FLASH	BOLD, CBV	AFNI	Stimulus-evoked fMRI	Lab-made	GLM, ROI	Parametric			Female
2019-12-03 09:59:06	3	Sheep	8	Anesthesia free-breathing	Telazol	3T or less		GE-EPI	BOLD	SPM	Stimulus-evoked fMRI	Lab-made	GLM, ROI	Parametric			Both
2019-12-03 10:03:50	4	Rhesis monkey	3	Awake		3T or less		GE-EPI	CBV	SPM	Stimulus-evoked fMRI	M12 anatomical	GLM	Parametric
2019-12-03 10:05:23	5														NA
2019-12-03 10:08:35	6	Rat other	11	Anesthesia ventilated	Isoflurane	9.4T		GE-EPI	BOLD, CBV	SPM, AFNI	Stimulus-evoked fMRI, Opto fMRI	Lab-made	GLM, ROI	Parametric
2019-12-03 10:12:22	7	Rat Long evans	7	Anesthesia free-breathing	Medetomidine	7T		GE-EPI	BOLD	SPM	Stimulus-evoked fMRI		GLM, ROI	Parametric
2019-12-03 10:17:11	8	Rat Sprague	12	Anesthesia free-breathing	Isoflurane	7T		GE-EPI	BOLD	FSL, AFNI	Stimulus-evoked fMRI, Resting-state fMRI	Lab-made	GLM, dual-regression	Non-parametric
2019-12-03 10:20:50	9	Rat Sprague	10		Urethane	9.4T		SE-EPI, MB-SWIFT	BOLD	Lab made	Deep-brain stimulation fMRI		GLM, ROI	Parametric			Male
2019-12-03 10:24:47	10	Rat Sprague	27	Anesthesia ventilated	Isoflurane	9.4T		GE-EPI	BOLD	FSL, AFNI	Stimulus-evoked fMRI, Resting-state fMRI	Lab-made	GLM, ROI, Seed-based, Network analysis	Parametric
2019-12-03 10:29:59	11	Dog	10	Anesthesia free-breathing		3T or less		GE-EPI	BOLD	SPM	Stimulus-evoked fMRI	Lab-made	GLM, ROI	Parametric		public repository
2019-12-03 10:34:57	12	Rat Sprague	10	Awake restrained, Anesthesia free-breathing	Isoflurane	7T		GE-EPI	BOLD	FSL	Stimulus-evoked fMRI, Resting-state fMRI	Lab-made	GLM, ROI, Seed-based, Network analysis	Parametric
2019-12-03 10:38:25	13	Cat	4	Awake restrained		3T or less		GE-EPI	BOLD	AFNI	Stimulus-evoked fMRI		GLM, ROI	Parametric			Both
2019-12-03 10:42:35	14	Rat Sprague	16	Anesthesia free-breathing	Isoflurane, Medetomidine, Combinations	9.4T		GE-EPI	BOLD	AFNI	Stimulus-evoked fMRI, Resting-state fMRI	Lab-made	GLM, ROI, Seed-based	Parametric
2019-12-03 10:46:09	15	Pigeon	4	Awake restrained		7T		RARE	BOLD	SPM	Stimulus-evoked fMRI, Resting-state fMRI	Lab-made	GLM, ROI, Seed-based	Parametric
2019-12-03 10:49:58	16	Rat Sprague	60	Anesthesia ventilated	Isoflurane	7T		GE-EPI	BOLD	SPM	Resting-state fMRI, Opto fMRI	Lab-made	GLM, ROI, Seed-based, Network analysis, ALFF	Parametric		contact author	Male
2019-12-03 10:52:49	17	Marmoset	3	Awake restrained		7T		GE-EPI	BOLD	SPM, Lab made	Stimulus-evoked fMRI		GLM, ROI				Male
2019-12-03 10:57:15	18	Rat other	28	Anesthesia free-breathing	Medetomidine	4.7T		GE-EPI	CBV	FSL	Stimulus-evoked fMRI	RAT Schwarz	GLM, ROI	Parametric			Male
2019-12-03 10:59:55	19	Rat Sprague	14	Anesthesia free-breathing	Î±-chloralose	9.4T		GE-EPI	BOLD, CBV	SPM	Stimulus-evoked fMRI	Lab-made	GLM, ROI	Parametric			Male
2019-12-03 11:11:25	20	Rat Sprague	16	Anesthesia free-breathing	Medetomidine	7T, 14T or more		GE-EPI, SE-EPI, SPEN	BOLD	SPM	Stimulus-evoked fMRI		GLM, ROI	Parametric			Male
2019-12-03 11:14:48	21	Rat Sprague	28	Anesthesia ventilated	Medetomidine	9.4T		GE-EPI	BOLD	FSL, AFNI	Stimulus-evoked fMRI	Lab-made	GLM	Parametric			Male
2019-12-03 11:17:05	22	Marmoset	3	Awake		7T		GE-EPI	BOLD	AFNI	Stimulus-evoked fMRI		GLM, ROI	Parametric			Male
2019-12-03 11:20:44	23	Macaque	10	Anesthesia ventilated	Isoflurane, Fentanyl	4.7T		GE-EPI	BOLD	Lab made	Stimulus-evoked fMRI		GLM, ROI
2019-12-03 11:24:26	24	Rat Sprague	23	Anesthesia ventilated	Î±-chloralose	9.4T		GE-EPI	BOLD, CBV	AFNI	Stimulus-evoked fMRI, Resting-state fMRI	Lab-made	GLM, ROI, Seed-based
2019-12-03 11:24:55	25														NA
2019-12-03 11:27:22	26	Rat Sprague	27	Anesthesia free-breathing	Isoflurane	4.7T		GE-EPI	BOLD, CBF	Lab made, SIMULATE		Lab-made	GLM				Male
2019-12-03 11:31:07	27	Rat Sprague		Anesthesia free-breathing	Isoflurane	7T		GE-EPI, bSSFP	BOLD		Opto fMRI	Lab-made	GLM, ROI				Female
2019-12-03 11:34:16	28	Mouse Black6	16	Awake restrained, Anesthesia free-breathing	Medetomidine	7T		GE-EPI	BOLD	SPM	Resting-state fMRI	Lab-made	ICA
2019-12-03 11:37:23	29	Rabbit	10	Awake restrained		7T		GE-EPI	BOLD, MEMRI	AFNI	Stimulus-evoked fMRI		GLM, ROI				Female
2019-12-03 11:39:58	30	Rabbit	7	Awake restrained		9.4T		GE-EPI	BOLD	Lab made, ITK	Stimulus-evoked fMRI, Resting-state fMRI		GLM, ROI				Female
2019-12-03 11:43:02	31	Rhesus	2	Anesthesia ventilated	Isoflurane	3T or less		GE-EPI	CBV	AFNI	Pharma fMRI	Saleem-Logothetis	GLM, ROI				Male
2019-12-03 11:45:13	32	Zebra Finch		Anesthesia free-breathing	Isoflurane	7T		GE-EPI	BOLD	SPM	Stimulus-evoked fMRI	zebra finch brain MRI atlas	GLM
2019-12-03 11:47:28	33	Rat Long evans	42	Awake restrained, Anesthesia free-breathing	Isoflurane	4.7T		GE-EPI	BOLD	SPM	Resting-state fMRI		Seed-based				Male
2019-12-03 11:50:26	34	Rat Sprague	12	Anesthesia ventilated	Isoflurane	7T		GE-EPI	BOLD	FSL, AFNI	Stimulus-evoked fMRI, Resting-state fMRI	RAT paxinos	GLM, Seed-based, ALFF				Male
2019-12-03 11:51:01	35														NA
2019-12-03 11:54:31	36	Pig	11			3T or less		GE-EPI	BOLD	AFNI	Deep-brain stimulation fMRI	PIG Saikali	GLM
2019-12-03 11:57:49	37	Dog	10	Anesthesia ventilated	Isoflurane	3T or less			BOLD	SPM	Stimulus-evoked fMRI		GLM, ROI				Male
2019-12-03 13:23:19	38	Rat Winsor	47	Anesthesia ventilated	Isoflurane, Medetomidine, Î±-chloralose, Urethane, thiobutabarbital	7T		SE-EPI	BOLD	SPM, Lab made	Stimulus-evoked fMRI, Resting-state fMRI, Pharma fMRI	Lab-made	GLM, ROI, Network analysis				Male
2019-12-03 13:27:05	39	Rat Winsor	19	Anesthesia ventilated	Halothane	7T		GE-EPI	BOLD, CBF	STIMULATE	Stimulus-evoked fMRI		GLM
2019-12-03 13:29:49	40	Rat Sprague		Anesthesia ventilated	Î±-chloralose	7T		FSE		Lab made	Stimulus-evoked fMRI		GLM, ROI				Male
2019-12-03 13:33:25	41	Rhesus	2	Awake restrained		3T or less		GE-EPI	CBV	SPM	Stimulus-evoked fMRI	M12 anatomical template	GLM				Male
2019-12-03 13:35:52	42	Mouse Black6	20	Anesthesia free-breathing	Medetomidine	7T		GE-EPI	BOLD	SPM	Stimulus-evoked fMRI	Lab-made	GLM, ROI				Male
2019-12-03 13:38:26	43	Rat Sprague	24	Anesthesia free-breathing	chloral hydrate	3T or less		GE-EPI	BOLD		Resting-state fMRI		Granger				Male
2019-12-03 13:41:11	44	Rat Sprague	7	Anesthesia free-breathing	Medetomidine	7T		GE-EPI	BOLD	SPM	Deep-brain stimulation fMRI		GLM, ROI, ICA				Male
2019-12-03 13:43:03	45	Rat Sprague	10	Anesthesia ventilated	Isoflurane, Î±-chloralose	9.4T		GE-EPI	BOLD, CBV		Deep-brain stimulation fMRI		GLM, ROI				Male
2019-12-03 13:45:41	46	Rhesus	2	Awake		4.7T		GE-EPI	BOLD	FSL	Stimulus-evoked fMRI	Saleem and Logothetis	GLM, ROI	Non-parametric			Male
2019-12-03 13:49:24	47	Rat Sprague	10	Anesthesia free-breathing	Medetomidine	7T		Spiral	BOLD	SPM	Opto fMRI		GLM, ROI				Male
2019-12-03 13:53:30	48	Macaque	4	Awake, Anesthesia free-breathing	Fentanyl, remifentanil	7T		GE-EPI	BOLD	AFNI, Freesurfer, Lab made	Stimulus-evoked fMRI		GLM, ROI			public repository	Both
2019-12-03 13:55:48	49	Mouse Black6	8			9.4T			BOLD		Stimulus-evoked fMRI
2019-12-03 13:58:18	50	Mouse Black6	20	Awake		7T		FSE	BOLD	SPM	Stimulus-evoked fMRI	MOUSE Sawiak	GLM				Male
2019-12-03 14:01:57	51	Rat Winsor	18	Anesthesia free-breathing	Isoflurane, Medetomidine, Combinations	7T		SE-EPI		SPM, Lab made	Stimulus-evoked fMRI, Resting-state fMRI	Lab-made	GLM, ROI, Network analysis				Male
2019-12-03 14:04:01	52	Cat	6	Anesthesia free-breathing	alfaxalone	3T or less		GE-EPI	BOLD	SPM, Lab made	Stimulus-evoked fMRI	CAT Jia	GLM				Both
2019-12-03 14:05:46	53	Rat Sprague		Anesthesia free-breathing	Medetomidine	9.4T		GE-EPI	BOLD		Resting-state fMRI						Male
2019-12-03 14:07:40	54	Squirrel Monkey	8		Isoflurane, Ketamine	9.4T		GE-EPI	BOLD	Lab made	Stimulus-evoked fMRI		GLM, ROI
2019-12-03 14:42:48	55	Cat	13	Anesthesia ventilated	Isoflurane, Î±-chloralose	9.4T		GE-EPI	CBV	Lab made	Stimulus-evoked fMRI		GLM, ROI
2019-12-03 14:45:06	56	Squirrel Monkey	2	Anesthesia ventilated	Isoflurane	9.4T		GE-EPI	BOLD	SPM	Resting-state fMRI		ROI, Seed-based				Male
2019-12-03 14:47:37	57	Cat		Anesthesia ventilated	Isoflurane	9.4T		SE-EPI	BOLD	Lab made, BrainVoyager	Stimulus-evoked fMRI		GLM
2019-12-03 14:51:33	58	Mouse Black6	6	Anesthesia ventilated	Isoflurane	9.4T		GE-EPI	BOLD	SPM, FSL	Stimulus-evoked fMRI	MOUSE Australian mouse brain mapping consortium (AMBMC)	GLM, ROI				Male
2019-12-03 14:54:27	59	Rhesus	3	Awake		3T or less		GE-EPI	BOLD	SPM, Lab made	Pharma fMRI		GLM, ROI				Female
2019-12-03 14:59:25	60	Rat Winsor	52	Anesthesia free-breathing	Î±-chloralose	4.7T		FLASH	CBV	Lab made	Stimulus-evoked fMRI, Pharma fMRI		GLM, ROI				Male
2019-12-03 15:03:53	61	Rat Sprague	6	Anesthesia free-breathing	Î±-chloralose	9.4T		GE-EPI	BOLD	SPM	Stimulus-evoked fMRI		GLM, ROI
2019-12-03 15:06:42	62	Rat Sprague	30	Anesthesia free-breathing	Urethane	7T		GE-EPI	BOLD	SPM, REST	Resting-state fMRI	RAT Paxinos	ALFF
2019-12-03 15:09:25	63	Rhesus	3	Anesthesia ventilated	Fentanyl, Combinations	4.7T		GE-EPI	BOLD		Stimulus-evoked fMRI	Lab-made	GLM, ROI
2019-12-03 15:11:58	64	Rhesus	3	Awake		4.7T		GE-EPI	CBV	AFNI, Lab made	Stimulus-evoked fMRI		GLM, ROI				Female
2019-12-03 15:17:11	65	Rat Winsor	22	Anesthesia free-breathing	Medetomidine	7T		SE-EPI	BOLD	STIMULATE	Stimulus-evoked fMRI		GLM, ROI				Male
2019-12-03 15:20:56	66	Rat Long evans, Rat other	10	Anesthesia ventilated	Î±-chloralose	9.4T		GE-EPI	BOLD		Stimulus-evoked fMRI		GLM, ROI				Male
2019-12-03 15:24:47	67	Rat Sprague	16	Anesthesia ventilated	Î±-chloralose	7T		FLASH	BOLD, CBF	Lab made	Stimulus-evoked fMRI		GLM, ROI				Male
2019-12-03 15:29:48	68	Mouse Black6, Mouse other, Rat Sprague	150	Anesthesia free-breathing, Anesthesia ventilated	Isoflurane, Medetomidine, Etomidate	4.7T, 9.4T		GE-EPI	BOLD, CBF	AFNI, Lab made	Stimulus-evoked fMRI, Resting-state fMRI, Pharma fMRI	Lab-made	GLM, ROI				Male
2019-12-03 15:32:41	69	Baboon	5	Anesthesia ventilated	Isoflurane	3T or less		GE-EPI	BOLD, CBF	FSL, Lab made	Stimulus-evoked fMRI		GLM, ROI				Female
2019-12-03 15:35:53	70	Rhesus	6	Anesthesia ventilated	Isoflurane	7T		GE-EPI	BOLD	SPM	Resting-state fMRI	F99 template	dual-regression, Network analysis
2019-12-03 15:38:16	71	Rat Sprague	12	Anesthesia free-breathing	Î±-chloralose	7T		GE-EPI	BOLD	SPM	Pharma fMRI	Lab-made	GLM				Male
2019-12-03 15:40:42	72	Cat		Anesthesia ventilated	Isoflurane	4.7T		GE-EPI	BOLD		Stimulus-evoked fMRI		ROI
2019-12-03 15:43:34	73	Rat Winstar	12	Anesthesia free-breathing	Isoflurane	4.7T		GE-EPI	BOLD, CBF	AFNI, Lab made	Stimulus-evoked fMRI		GLM				Male
2019-12-03 15:46:02	74	Rhesus	3	Anesthesia ventilated	remifentanil	4.7T		GE-EPI	BOLD	Lab made	Stimulus-evoked fMRI		GLM				Male
2019-12-03 15:50:08	75	Cat		Anesthesia ventilated	Isoflurane	9.4T		GE-EPI	BOLD	Lab made	Stimulus-evoked fMRI		GLM, ROI
2019-12-03 15:53:00	76	Rat other	22	Anesthesia free-breathing	Medetomidine	9.4T		GE-EPI	BOLD	FSL	Stimulus-evoked fMRI		GLM, ROI
2019-12-03 15:57:00	77	Rat Winstar	16	Anesthesia free-breathing	Isoflurane	4.7T			BOLD	BrainVoyager	Stimulus-evoked fMRI	Lab-made	GLM, ROI				Male
2019-12-03 16:00:12	78	Rhesus	6	Anesthesia ventilated	Isoflurane	7T		GE-EPI	BOLD	FSL	Resting-state fMRI	F99 atlas template	Seed-based, Network analysis				Both
2019-12-03 16:03:18	79	Rat Sprague	21	Anesthesia ventilated	Î±-chloralose	11.7T		FLASH	CBV	Lab made	Stimulus-evoked fMRI		GLM, ROI				Male
2019-12-03 16:05:20	80	Rat Winstar	5	Anesthesia free-breathing	Isoflurane	7T		GE-EPI	BOLD	SPM	Stimulus-evoked fMRI	Lab-made	GLM, ROI
2019-12-03 16:12:51	81	Rat other	8	Anesthesia free-breathing	Isoflurane, Medetomidine			GE-EPI	BOLD	Lab made	Stimulus-evoked fMRI, Resting-state fMRI	RAT Paxinos	GLM, ROI, ICA
2019-12-03 16:15:16	82	Rat Sprague	18	Anesthesia ventilated	Î±-chloralose	7T		SE-EPI	BOLD	SPM, Lab made	Stimulus-evoked fMRI	Lab-made	GLM				Male
2019-12-03 16:54:30	83	Rhesus	3	Anesthesia free-breathing	Propofol, droperidol	3T or less		GE-EPI	BOLD	MEDx	Stimulus-evoked fMRI		GLM, ROI				Both
2019-12-03 16:59:23	84	Rhesus	2	Awake		3T or less		GE-EPI	CBV	SPM	Stimulus-evoked fMRI	Lab-made	GLM, ROI				Male
2019-12-03 17:05:08	85	Rat other	6	Anesthesia ventilated	Fentanyl	3T or less		GE-EPI	CBV	SPM, Lab made	Stimulus-evoked fMRI	Lab-made	GLM, ROI, Granger				Male
2019-12-03 17:05:39	86														NA
2019-12-03 17:08:24	87	Pig	15	Awake restrained		3T or less		GE-EPI	BOLD	AFNI	Stimulus-evoked fMRI		GLM				Female
2019-12-03 17:11:52	88	Ferret	13	Anesthesia ventilated	Isoflurane, Ketamine	9.4T		GE-EPI, SE-EPI	BOLD	SPM, Lab made	Resting-state fMRI	Lab-made	GLM, ROI				Female
2019-12-03 17:14:15	89	Rat Sprague	7	Anesthesia free-breathing	Isoflurane	7T		GE-EPI	BOLD	SPM	Stimulus-evoked fMRI		GLM				Male
2019-12-03 17:19:00	90	Rat Sprague	24	Anesthesia ventilated	Isoflurane	11.7T		GE-EPI, FLASH	BOLD, MEMRI	AFNI, Lab made	Stimulus-evoked fMRI		GLM, ROI				Male
2019-12-03 17:21:08	91	Rat Sprague	5	Anesthesia free-breathing	Propofol	3T or less		GRASS	BOLD		Stimulus-evoked fMRI		GLM, ROI				Female
2019-12-03 17:22:49	92	Rat Long evans	5	Awake		4.7T		FLASH	BOLD	STIMULATE	Stimulus-evoked fMRI		ROI				Both
2019-12-03 17:24:56	93	Rat other	4	Awake restrained		7T		GE-EPI	BOLD		Stimulus-evoked fMRI		ROI				Female
2019-12-03 17:26:55	94	Dog	2	Awake		3T or less		GE-EPI	BOLD	AFNI	Stimulus-evoked fMRI		GLM, ROI				Female
2019-12-03 17:29:34	95	Rat Winstar	8	Awake restrained		4.7T		FSE	BOLD	Lab made	Stimulus-evoked fMRI		GLM, ROI				Male
2019-12-03 17:31:40	96	Rhesus	2	Anesthesia free-breathing	Isoflurane	3T or less		GE-EPI	BOLD	Lab made	Stimulus-evoked fMRI		GLM
2019-12-03 17:36:01	97	Rat other	22	Anesthesia ventilated	Fentanyl, Combinations, haloperidol	9.4T		GE-EPI, SE-EPI	BOLD, CBV	Lab made	Stimulus-evoked fMRI	Lab-made	GLM, ROI				Both
2019-12-03 17:38:46	98	Rat Sprague	14	Anesthesia free-breathing	Urethane	7T		GE-EPI	BOLD	SPM, FSL, AFNI, Lab made	Stimulus-evoked fMRI	RAT Paxinos	GLM, ROI				Male
2019-12-03 17:42:40	99	Mouse Black6	12	Anesthesia free-breathing	Medetomidine	7T		GE-EPI	BOLD	SPM	Stimulus-evoked fMRI, Resting-state fMRI	MOUSE Allen Institute for Brain Science (AIBS)	GLM, ROI, Network analysis, Graph theory				Male
2019-12-03 17:45:28	100	Cat	5	Anesthesia ventilated	Isoflurane, Ketamine, Combinations	7T		GE-EPI	BOLD	SPM	Stimulus-evoked fMRI		GLM, ROI
2019-12-03 17:47:46	101	Rat Sprague	14	Anesthesia ventilated	Isoflurane	9.4T		GE-EPI	BOLD	Lab made	Deep-brain stimulation fMRI	RAT Paxinos	GLM, ROI				Male
3/13/2019 10:47:18	202	Rat Sprague	15	Anesthesia ventilated	Î±-chloralose	9.4T		FSE	BOLD	Lab made	Stimulus-evoked fMRI		GLM, ROI
3/13/2019 10:49:48	203	Rat Sprague	20	Anesthesia ventilated	Medetomidine	9.4T		GE-EPI	BOLD	FSL, AFNI	Stimulus-evoked fMRI, Resting-state fMRI	Lab-made	GLM, ROI, Network analysis				Male
3/13/2019 10:52:24	204	Rat Sprague	13	Anesthesia ventilated	Î±-chloralose	9.4T		GE-EPI	BOLD, CBV	Lab made	Stimulus-evoked fMRI		GLM, ROI				Male
3/13/2019 10:54:18	205		6	Anesthesia ventilated	Î±-chloralose	9.4T		GE-EPI	CBV	AFNI	Resting-state fMRI		Seed-based
3/13/2019 10:56:23	206	Mouse Black6	34	Anesthesia ventilated	Isoflurane, Medetomidine, Urethane, Propofol	9.4T		GE-EPI	BOLD	AFNI, Lab made	Stimulus-evoked fMRI	Lab-made	GLM, ROI				Female
3/13/2019 10:58:07	207	Rat Sprague	9	Anesthesia free-breathing	Isoflurane	4.7T		GE-EPI	BOLD, CBF	Lab made, STIMULATE	Stimulus-evoked fMRI		GLM				Male
3/13/2019 10:59:28	208	Rat Sprague	10	Anesthesia ventilated	Isoflurane	11.7T		GE-EPI	BOLD	Lab made, STIMULATE	Stimulus-evoked fMRI		GLM, ROI				Male
3/13/2019 11:03:57	209	Cat	7	Anesthesia ventilated	Isoflurane	3T or less		GE-EPI	BOLD	SPM, Lab made	Stimulus-evoked fMRI		GLM, ROI				Both
3/13/2019 11:01:31	210	Rat Sprague	16	Awake		4.7T		GE-EPI	BOLD	Lab made	Stimulus-evoked fMRI	Lab-made	GLM				Male
3/13/2019 11:08:43	211	Rat Sprague	12	Anesthesia free-breathing	Urethane	9.4T		GE-EPI	BOLD	FSL	Stimulus-evoked fMRI	RAT Paxinos	GLM, ROI				Female
3/13/2019 11:05:43	212	Rat Sprague	24	Awake restrained		4.7T		SE-EPI	BOLD	Stimulate		Lab-made	GLM, ROI				Male
3/13/2019 11:10:25	213	Rat Sprague	13	Anesthesia ventilated	Î±-chloralose	11.7T		SE-EPI	BOLD	TheSTIMULATE	Stimulus-evoked fMRI		GLM, ROI				Male
3/13/2019 11:12:52	214	Gerbil	5	Anesthesia free-breathing	Halothane	4.7T		FLASH	BOLD	Lab made	Stimulus-evoked fMRI		GLM, ROI
3/13/2019 11:14:42	215	Rat Sprague	7	Anesthesia ventilated	Î±-chloralose	7T		GRASS	BOLD	Lab made	Stimulus-evoked fMRI		GLM, ROI				Male
3/13/2019 11:16:46	216	Rat other	18	Anesthesia ventilated	Isoflurane	4.7T		RARE	CBV		Stimulus-evoked fMRI						Male
3/13/2019 11:19:19	217	Rat Winstar	28	Anesthesia ventilated	Î±-chloralose	4.7T		GE-EPI	BOLD	Lab made	Stimulus-evoked fMRI	Lab-made	GLM, ROI				Male
3/13/2019 11:21:12	218	Rat Sprague	4	Anesthesia free-breathing	Isoflurane	9.4T		GE-EPI	BOLD	FSL	Resting-state fMRI		Seed-based, ICA, Network analysis, Graph theory				Male
3/13/2019 11:24:09	219	Dog	6	Anesthesia free-breathing	Isoflurane, Propofol, Fentanyl, Combinations, midazolam	4.7T		GE-EPI	BOLD	Stimulate.	Stimulus-evoked fMRI		Seed-based				Female
3/13/2019 11:26:15	220	Rat Sprague	13	Anesthesia free-breathing	Isoflurane	9.4T		SE-EPI	BOLD, CBV	Lab made	Stimulus-evoked fMRI		GLM				Male
3/13/2019 11:28:51	221	Rhesus	2	Awake restrained		4.7T		GE-EPI	BOLD	BrainVoyager	Stimulus-evoked fMRI		GLM, ROI				Male
3/13/2019 11:31:08	222	Rat Sprague	8	Awake restrained		4.7T		GE-EPI	BOLD	STIMULATE	Pharma fMRI		GLM, ROI				Male
3/13/2019 11:33:12	223	Rhesus	4	Awake restrained		3T or less		GE-EPI	CBV	Freesurfer	Stimulus-evoked fMRI		GLM, ROI				Both
3/13/2019 11:37:09	224	Rat Winstar	22	Anesthesia free-breathing	Medetomidine	11.7T		GE-EPI	BOLD	FSL	Resting-state fMRI		Seed-based, Network analysis				Male
3/13/2019 11:40:00	225	Rat Sprague	11	Anesthesia ventilated	Î±-chloralose	11.7T		GE-EPI	BOLD, CBV		Stimulus-evoked fMRI		GLM, ROI				Male
3/13/2019 11:42:27	226	Rat Sprague	47	Anesthesia ventilated	Î±-chloralose	11.7T		SE-EPI	BOLD	Lab made, STIMULATE	Stimulus-evoked fMRI	Lab-made	GLM, ROI
3/13/2019 11:45:06	227	Rat Sprague	17	Anesthesia ventilated	Î±-chloralose	4.7T		GE-EPI	BOLD		Stimulus-evoked fMRI		GLM, ROI				Female
3/13/2019 12:46:05	102	Rat Winstar	7	Anesthesia ventilated	Î±-chloralose	9.4T		FSE	BOLD	EvIdent	Stimulus-evoked fMRI		GLM, ROI				Male
3/13/2019 12:49:03	103	Rat other		Anesthesia ventilated	Î±-chloralose	9.4T		GE-EPI	CBV	AFNI	Stimulus-evoked fMRI		GLM
3/13/2019 12:51:14	104	Rat Winstar		Anesthesia free-breathing	Medetomidine	9.4T		FAIR	CBF	Lab made	Stimulus-evoked fMRI		GLM, ROI				Male
3/13/2019 12:53:52	105	Rat Sprague	15	Anesthesia free-breathing	Urethane	7T		FLASH	BOLD	Lab made	Stimulus-evoked fMRI		GLM, ROI				Male
3/13/2019 12:55:55	106	Rat Winstar	12	Awake restrained		4.7T		GEFI	BOLD		Stimulus-evoked fMRI						Male
3/13/2019 12:57:55	107	Rat Sprague		Anesthesia ventilated	Î±-chloralose	7T					Stimulus-evoked fMRI						Male
3/13/2019 13:00:29	108	Rat Winstar	24		chloral hydrate	3T or less		T1SE	MEMRI	SPM	Stimulus-evoked fMRI	Lab-made					Male
3/13/2019 13:03:19	109	Rat Sprague	6	Anesthesia ventilated	Halothane	7T		FLASH	BOLD	SPM	Stimulus-evoked fMRI		GLM, ROI
3/13/2019 13:05:45	110	Rhesus	1	Awake		3T or less		GE-EPI	BOLD	AFNI	Stimulus-evoked fMRI		GLM				Male
3/13/2019 13:08:19	111	Rat Sprague	15	Anesthesia free-breathing	Medetomidine	4.7T		GE-EPI	BOLD	SPM	Stimulus-evoked fMRI	RAT Schweinhardt	GLM, DCM				Male
3/13/2019 13:10:01	112	Rat Sprague	11	Anesthesia free-breathing	Isoflurane	4.7T		GE-EPI	BOLD, CBF	Lab made	Pharma fMRI		GLM, ROI				Male
3/13/2019 13:12:18	113	Dog	14	Awake		3T or less		GE-EPI	BOLD	SPM	Stimulus-evoked fMRI		GLM
3/13/2019 13:13:53	114	Rat Sprague	12	Anesthesia ventilated	Isoflurane	11.7T		GE-EPI	BOLD	Lab made	Deep-brain stimulation fMRI		GLM, ROI				Male
3/13/2019 13:15:28	115	Rat Sprague	6	Anesthesia free-breathing	Î±-chloralose	7T		FLASH	BOLD	Lab made	Stimulus-evoked fMRI		GLM				Male
3/13/2019 13:18:02	116	Rat other	32	Awake restrained		7T		FSE	BOLD	SPM	Stimulus-evoked fMRI	RAT Karolinska	GLM				Male
3/13/2019 13:20:42	117	Rat Sprague		Anesthesia free-breathing	chloral hydrate	3T or less		SE-EPI	BOLD	SPM	Resting-state fMRI	RAT Schwarz	Seed-based				Female
3/13/2019 13:23:36	118	Rat Long evans	18	Anesthesia free-breathing	Isoflurane, Medetomidine	7T		GE-EPI	BOLD	SPM	Deep-brain stimulation fMRI		GLM, ROI				Male
3/13/2019 18:33:45	119	Rat Long evans	8	Anesthesia free-breathing	Isoflurane	9.4T			FSE	EvIdent	Deep-brain stimulation fMRI		GLM, ROI, Network analysis				Male
3/13/2019 18:36:24	120	Rhesus	2	Awake		3T or less		GE-EPI	BOLD	SPM	Stimulus-evoked fMRI	Lab-made	GLM, ROI
3/14/2019 9:43:27	228	Rhesus	3	Awake		4.7T		GE-EPI	BOLD	AFNI, Lab made	Resting-state fMRI		ROI				Female
3/14/2019 9:45:26	229	Rat other	10	Awake restrained		4.7T		GE-EPI	BOLD		Resting-state fMRI		ROI				Male
3/14/2019 9:48:04	230	Rhesus	3	Awake		3T or less		GE-EPI	BOLD	SPM	Stimulus-evoked fMRI	MACAQUE 112RM-SL	GLM				Both
3/14/2019 10:03:08	231	Rhesus	2	Awake		3T or less		GE-EPI	CBV		Stimulus-evoked fMRI		GLM				Both
3/14/2019 10:05:47	232	Rat Sprague	4	Anesthesia free-breathing	Halothane	9.4T			CBV		Stimulus-evoked fMRI		GLM, ROI
3/14/2019 10:07:30	233	Zebra finch	16	Anesthesia free-breathing	Isoflurane	4.7T		SE-EPI	BOLD	SPM	Stimulus-evoked fMRI	Lab-made	GLM				Male
3/14/2019 10:09:34	234	Rat Sprague	12	Awake		4.7T		GE-EPI	BOLD	FSL	Stimulus-evoked fMRI	Lab-made	GLM				Male
3/14/2019 10:14:00	235	Rat Sprague	21	Anesthesia ventilated	Medetomidine	9.4T		GE-EPI	BOLD	FSL	Stimulus-evoked fMRI	Lab-made	GLM, ROI				Male
3/14/2019 10:16:59	236	Rat Sprague		Anesthesia free-breathing	Î±-chloralose, Halothan	7T		FSE	BOLD	Lab made	Stimulus-evoked fMRI		GLM, ROI
3/14/2019 10:19:11	237	Cat	4	Anesthesia ventilated	Isoflurane	9.4T		GE-EPI	CBV	Lab made, Stimulate	Stimulus-evoked fMRI		GLM, ROI				Female
3/14/2019 10:21:27	239	Rat Winstar	7	Anesthesia free-breathing	Ketamine	4.7T		FLASH	BOLD	Lab made	Stimulus-evoked fMRI	Lab-made	GLM, ROI				Male
3/14/2019 10:23:12	240	Rhesus		Awake		3T or less		FLASH	BOLD	Lab made	Stimulus-evoked fMRI		GLM, ROI				Female
3/14/2019 10:25:34	241	Rhesus	2	Awake		3T or less		GE-EPI	BOLD	Freesurfer	Stimulus-evoked fMRI		GLM, ROI				Male
3/14/2019 10:28:02	242	Rat Sprague	36	Anesthesia ventilated	Î±-chloralose	4.7T		GE-EPI	BOLD	SPM	Stimulus-evoked fMRI		GLM				Female
3/14/2019 10:30:18	243	Cat	5	Anesthesia ventilated	Isoflurane	4.7T		GE-EPI, FAIR	BOLD, CBF	Lab made	Stimulus-evoked fMRI		GLM, ROI				Female
3/14/2019 10:32:51	244	Rhesus	4	Awake restrained		3T or less		GE-EPI	CBV	SPM	Stimulus-evoked fMRI		GLM				Male
3/14/2019 10:34:22	245	Rat Sprague		Anesthesia free-breathing	Isoflurane	7T		SE-EPI	BOLD	SPM, STIMULATE	Stimulus-evoked fMRI		GLM, ROI				Both
3/14/2019 10:35:58	246														NA
3/14/2019 10:37:49	247	Rhesus	4	Anesthesia free-breathing	remifentanil	4.7T		GE-EPI	BOLD	Lab made	Stimulus-evoked fMRI		GLM, ROI
3/14/2019 10:39:06	248	Rat Sprague		Anesthesia ventilated	Î±-chloralose	7T		GE-EPI	BOLD		Stimulus-evoked fMRI		ROI				Male
3/14/2019 10:41:07	249	Rhesus	7	Anesthesia ventilated	Isoflurane	3T or less		GE-EPI	BOLD				GLM, ROI				Female
3/14/2019 10:43:01	250	Rat Sprague	8	Anesthesia free-breathing	Isoflurane	4.7T		GE-EPI, FSE	CBV, CBF	STIMULATE	Stimulus-evoked fMRI		GLM, ROI				Male
3/14/2019 10:48:03	251	Rat Sprague	10	Anesthesia ventilated	Î±-chloralose	11.7T		GE-EPI	BOLD	Lab made	Stimulus-evoked fMRI		GLM, ROI				Male
3/14/2019 10:50:13	252	Rat Sprague	8	Anesthesia free-breathing	Isoflurane	3T or less		RARE	BOLD	SPM	Stimulus-evoked fMRI	Lab-made	GLM
3/14/2019 10:52:18	253	Rat Winstar		Anesthesia free-breathing	Isoflurane	4.7T		CASL	CBF	Lab made	Stimulus-evoked fMRI	Lab-made	GLM				Male
3/14/2019 10:56:29	254	Rat Sprague	6	Anesthesia free-breathing	Urethane	7T		FLASH	BOLD	Lab made	Stimulus-evoked fMRI		GLM, ROI				Both
3/14/2019 11:08:00	255	Mouse other	12	Anesthesia ventilated	Isoflurane	4.7T		RARE	CBV		Stimulus-evoked fMRI		ROI
3/14/2019 11:09:11	256														NA
3/14/2019 11:14:05	257	Rat Sprague	56	Anesthesia free-breathing	Ketamine, Combinations, xylazine	7T		GE	BOLD		Stimulus-evoked fMRI		GLM
3/14/2019 11:15:44	258	Rat Sprague		Anesthesia free-breathing	Isoflurane	7T		bSSFP	CBV	STIMULATE	Stimulus-evoked fMRI		GLM, ROI
3/14/2019 11:19:36	259	Cat	3	Anesthesia free-breathing	Isoflurane	9.4T		GE-EPI	BOLD, CBV	Lab made, Stimulate	Stimulus-evoked fMRI	Lab-made	GLM
3/14/2019 11:21:57	261	Rhesus	2	Awake		3T or less		GE-EPI	BOLD	CARET	Stimulus-evoked fMRI	MACAQUE Saleem and Lgothetis	GLM, ROI				Male
3/14/2019 11:23:56	262	Rat Sprague		Anesthesia ventilated	Î±-chloralose	9.4T		FLASH	BOLD		Stimulus-evoked fMRI		GLM, ROI
3/14/2019 11:25:40	263	Rat Sprague		Anesthesia free-breathing	Urethane	7T, 9.4T		FLASH	BOLD	Lab made	Stimulus-evoked fMRI		GLM, ROI				Male
3/14/2019 11:27:09	264	Rat Sprague	15	Anesthesia ventilated		11.7T		GE-EPI	BOLD	AFNI	Stimulus-evoked fMRI		GLM, ROI				Male
3/14/2019 11:29:29	265	Rat Winstar	9	Anesthesia free-breathing	Î±-chloralose	7T		FLASH	BOLD	Lab made	Stimulus-evoked fMRI		GLM, ROI				Female
3/14/2019 11:32:20	266	Rhesus	2	Awake		3T or less		FLASH	BOLD	MEDx	Stimulus-evoked fMRI	Lab-made	GLM				Female
3/14/2019 11:33:14	267														NA
3/14/2019 11:34:49	268	Rat Sprague	4	Anesthesia ventilated	Halothane	4.7T		ASL	CBF		Stimulus-evoked fMRI		ROI				Male
3/14/2019 11:37:09	269	Rat other	11	Anesthesia ventilated	Forene	4.7T		RARE	CBV, CBF		Stimulus-evoked fMRI						Male
3/14/2019 11:39:43	270	Rat Sprague	14	Anesthesia ventilated	Î±-chloralose	11.7T		GE-EPI	BOLD	Lab made, STIMULATE	Stimulus-evoked fMRI	Lab-made	GLM
3/15/2019 16:05:36	271	Rat Sprague	7	Anesthesia ventilated	Î±-chloralose	3T or less		GE-EPI	CBV		Stimulus-evoked fMRI		GLM, ROI				Male
3/15/2019 16:09:58	272	Mouse Black6, Mouse other		Anesthesia ventilated	Isoflurane	4.7T		RARE	CBV	FSL	Pharma fMRI	Lab-made	GLM, ROI				Male
3/15/2019 16:17:34	273	Rat Sprague	14	Anesthesia ventilated	Î±-chloralose	7T		FSE	BOLD	Lab made	Stimulus-evoked fMRI		GLM, ROI
3/15/2019 16:20:34	274	Rhesus	3	Anesthesia ventilated	Isoflurane	7T		GE-EPI	BOLD	FSL, Lab made	Stimulus-evoked fMRI		GLM
3/15/2019 16:24:58	275	Rat Sprague	6	Anesthesia free-breathing	Î±-chloralose	7T		GE-EPI	BOLD	Lab made	Stimulus-evoked fMRI		GLM, ROI
3/15/2019 16:25:15	276														NA
3/15/2019 16:28:18	277	Rhesus	1	Awake restrained		3T or less		GE-EPI	BOLD	AFNI	Stimulus-evoked fMRI		GLM, ROI				Female
3/15/2019 16:32:17	278		53	Anesthesia ventilated	Î±-chloralose				BOLD	SPM	Stimulus-evoked fMRI	RAT Schweinhardt	GLM				Female
3/15/2019 16:34:04	279	Rhesus	6	Anesthesia free-breathing	Propofol	3T or less		GE-EPI	BOLD		Stimulus-evoked fMRI		GLM, ROI
3/15/2019 16:36:19	280	Rat Sprague	11	Anesthesia ventilated	Î±-chloralose	9.4T		GE-EPI	BOLD, CBV		Stimulus-evoked fMRI		GLM, ROI
3/15/2019 16:40:33	281	Rhesus	5	Awake		3T or less		GE-EPI	CBV	SPM	Stimulus-evoked fMRI	Lab-made	GLM, ROI				Male
3/15/2019 16:42:27	282	Rat Sprague	6	Anesthesia ventilated	Î±-chloralose	7T		FLASH-	BOLD	STIMULATE	Stimulus-evoked fMRI		GLM				Male
3/15/2019 16:51:48	283	Rat Sprague	6	Anesthesia free-breathing	Ketamine	3T or less		GE-EPI	BOLD	Lab made, MEDX	Stimulus-evoked fMRI		GLM, ROI				Male
3/15/2019 16:55:32	284	Mouse other		Anesthesia free-breathing	Isoflurane	7T		FSE	CBV		Stimulus-evoked fMRI		ROI
3/15/2019 16:59:05	285	Rat Winstar	14	Anesthesia ventilated	Fentanyl	9.4T		SE-EPI	BOLD, CBV	Lab made	Stimulus-evoked fMRI		GLM, ROI				Female
3/15/2019 17:01:48	286	Rat Long evans	15	Anesthesia ventilated	Î±-chloralose	9.4T		RARE	BOLD	Lab made	Deep-brain stimulation fMRI		GLM, ROI				Male
3/15/2019 17:04:10	287	Rat Winstar	6	Anesthesia ventilated	Isoflurane, Î±-chloralose	7T		FLASH	BOLD	MEDx	Stimulus-evoked fMRI		GLM				Male
3/15/2019 17:06:25	288	Mouse Black6	25	Anesthesia ventilated	Isoflurane	9.4T		GE-EPI, RARE	BOLD, CBV		Stimulus-evoked fMRI		GLM, ROI				Female
3/15/2019 17:09:05	289	Rhesus, Vervet monkey	11	Anesthesia ventilated	Isoflurane	3T or less		GE-EPI	BOLD	FSL	Resting-state fMRI	MACAQUE NITRC	Network analysis, Graph theory				Male
3/15/2019 17:10:17	290														NA
3/15/2019 17:11:43	291	Rat Sprague	8	Anesthesia free-breathing	Urethane	7T		FLASH	BOLD	Lab made	Stimulus-evoked fMRI		GLM, ROI				Male
3/15/2019 17:13:46	292	Rhesus	1	Awake		3T or less		GE-EPI	BOLD, CBV	AFNI	Stimulus-evoked fMRI		GLM, ROI				Male
3/15/2019 17:15:03	293	Rat Sprague	14	Anesthesia ventilated	Î±-chloralose	11.7T		GE-EPI	BOLD, CBV		Stimulus-evoked fMRI		ROI				Male
3/15/2019 17:17:20	294	Rhesus	2	Awake		7T		GE-EPI	BOLD	SPM			GLM				Male
3/15/2019 17:18:58	295	Rat Sprague		Awake restrained		4.7T		GE-EPI	BOLD	Stimulate	Pharma fMRI		GLM, ROI				Male
3/15/2019 17:21:28	296	Rhesus	3	Awake		3T or less		MGE	CBV	AFNI	Stimulus-evoked fMRI		GLM				Male
3/15/2019 17:23:46	297	Rat Sprague	3	Anesthesia ventilated	Isoflurane	4.7T		GE-EPI	BOLD	Lab made	Stimulus-evoked fMRI		ROI, ICA				Male
3/15/2019 17:25:15	298	Rhesus	3	Awake		3T or less		GE-EPI	BOLD		Stimulus-evoked fMRI		GLM				Male
3/15/2019 17:27:13	299	Rat Winstar	8	Anesthesia free-breathing	Medetomidine	7T		SE-EPI	BOLD	STIMULATE	Stimulus-evoked fMRI		GLM, ROI				Male
3/15/2019 17:27:40	300														NA
3/17/2019 11:12:02	121														NA
3/17/2019 11:16:05	122	Rat Sprague, Rat other	16	Anesthesia ventilated	Fentanyl, Combinations, haloperidol	9.4T		SE-EPI	BOLD	Lab made	Resting-state fMRI		Seed-based				Female
3/17/2019 11:19:14	123	Rat Sprague	21	Anesthesia ventilated	Medetomidine	9.4T		GE-EPI	BOLD	FSL, AFNI	Stimulus-evoked fMRI	Lab-made	GLM, ROI
3/17/2019 11:21:24	124	Cat	8	Anesthesia ventilated	Isoflurane	9.4T		GE-EPI, SE-EPI, ME-EPI	BOLD, CBV	Stimulate	Stimulus-evoked fMRI		GLM				Female
3/17/2019 11:23:52	125	Mouse Black6	26	Anesthesia free-breathing	Medetomidine	9.4T		GE-EPI	BOLD	SPM, Lab made	Stimulus-evoked fMRI	MOUSE Allen Institute for Brain Science (AIBS)	GLM, ROI				Female
3/17/2019 11:25:51	126	Rhesus	3	Awake		3T or less		MGRE	BOLD		Pharma fMRI		ROI				Female
3/17/2019 11:28:18	127	Rat Sprague	17	Anesthesia free-breathing	Î±-chloralose	7T		GE-EPI	BOLD, CBF	SPM, STIMULATE	Stimulus-evoked fMRI		GLM, ROI				Male
3/17/2019 11:31:47	128	Rhesus	2	Anesthesia free-breathing	Ketamine	3T or less		GE-EPI	CBV		Pharma fMRI	MACAQUE Saleemâ€“Logothetis	GLM, ROI				Male
3/17/2019 11:35:35	129	Rat Winstar	15	Anesthesia ventilated	Î±-chloralose	9.4T		FLASH	BOLD	EvIdent	Stimulus-evoked fMRI		GLM, ROI				Male
3/17/2019 11:38:17	130	Rat Sprague	18	Anesthesia free-breathing	Urethane	7T		GE-EPI	BOLD	Lab made	Stimulus-evoked fMRI		GLM, ROI
3/17/2019 11:40:59	131	Rat other	10	Anesthesia free-breathing	Isoflurane, Medetomidine	9.4T		GE-EPI	BOLD		Resting-state fMRI		dFC
3/17/2019 11:44:01	132	Rat Sprague	26	Awake		7T		FSE	BOLD	Lab made	Stimulus-evoked fMRI		GLM, ROI				Male
3/17/2019 11:45:58	133	Rat Sprague	6	Awake		4.7T		GE-EPI	BOLD	Stimulate	Stimulus-evoked fMRI		ROI				Male
3/17/2019 11:48:13	134	Rat Long evans	23	Anesthesia free-breathing	Isoflurane	7T		SE-EPI	BOLD	FSL	Pharma fMRI	Lab-made	GLM, ROI				Male
3/17/2019 11:50:19	135	Rabbit		Awake restrained		9.4T		GE-EPI	BOLD	Lab made	Stimulus-evoked fMRI		GLM, ROI				Female
3/18/2019 15:33:25	136	Rat Sprague	8	Anesthesia free-breathing	Î±-chloralose	9.4T		GRE	BOLD, CBV	Lab made	Stimulus-evoked fMRI		GLM, ROI				Male
3/18/2019 15:38:25	137	Rat Sprague	9	Anesthesia free-breathing	chloral hydrate			GE-EPI	BOLD	CCHIPS	Stimulus-evoked fMRI		GLM, ROI				Male
3/18/2019 15:44:39	138	Rat Sprague	42	Anesthesia ventilated	Isoflurane	4.7T		GE-EPI	BOLD	SPM	Stimulus-evoked fMRI	RAT Schweinhardt	GLM				Female
3/18/2019 15:47:17	139	Rat Sprague	10	Anesthesia free-breathing	Î±-chloralose	7T		GRE			Stimulus-evoked fMRI		GLM, ROI				Male
3/18/2019 15:50:24	140	Rat Sprague	3	Anesthesia ventilated	Fentanyl	4.7T		GE-EPI	BOLD	Stimulate	Stimulus-evoked fMRI		ROI				Male
3/18/2019 15:53:01	141	Rat Sprague	4	Anesthesia free-breathing	Medetomidine	9.4T		GE-EPI	BOLD		Resting-state fMRI		Seed-based				Male
3/18/2019 15:55:33	142	Pig	5	Anesthesia ventilated	thiopental	3T or less		GE-EPI			Stimulus-evoked fMRI		ROI				Female
3/18/2019 15:58:11	143	Rhesus	7	Anesthesia free-breathing		4.7T		GE-EPI	BOLD		Resting-state fMRI		ROI
3/18/2019 16:00:29	144	Rhesus	2	Awake restrained		3T or less		GE-EPI	CBV	Lab made	Stimulus-evoked fMRI		GLM				Male
3/18/2019 16:04:20	145	Rat Sprague, Cat	6	Anesthesia ventilated	Isoflurane	9.4T			CBV	STIMULATE	Stimulus-evoked fMRI		GLM, ROI				Female
3/18/2019 16:06:34	146	Rat Winstar	8	Anesthesia ventilated	Î±-chloralose	9.4T		FSE	BOLD	EvIdent	Stimulus-evoked fMRI		GLM, ROI
3/18/2019 16:08:38	147	Rat Sprague	6	Awake restrained, Anesthesia free-breathing	Propofol	3T or less		GE-EPI	BOLD		Stimulus-evoked fMRI						Male
3/18/2019 16:11:43	148	Rat other	15	Anesthesia ventilated	Isoflurane	7T		GE-EPI	BOLD	Lab made	Stimulus-evoked fMRI		GLM				Female
3/18/2019 16:14:02	149	Rat Sprague	20	Anesthesia ventilated	Î±-chloralose	9.4T		FLASH	BOLD	EvIdent	Stimulus-evoked fMRI		GLM, ROI
3/18/2019 16:16:42	150	Rat Sprague	6	Anesthesia free-breathing	Urethane	9.4T		FLASH	BOLD, CBV	Lab made	Stimulus-evoked fMRI						Male
3/18/2019 16:21:04	151	Rat other	17	Anesthesia ventilated	Urethane	3T or less		GE-EPI	BOLD, CBV	SPM	Stimulus-evoked fMRI						Female
3/18/2019 16:23:49	152	Rat Sprague	16	Anesthesia ventilated	Î±-chloralose	11.7T		FLASH	CBV	STIMULATE	Stimulus-evoked fMRI		GLM				Male
3/18/2019 16:25:45	153	Rhesus	2	Awake restrained		3T or less		GE-EPI	CBV	SPM	Stimulus-evoked fMRI		GLM				Both
3/18/2019 16:27:34	154	Rat Sprague	9	Anesthesia free-breathing	Isoflurane	9.4T		GE-EPI	BOLD	Lab made	Stimulus-evoked fMRI		GLM, ROI
3/18/2019 16:29:59	155	Rat other	21	Anesthesia ventilated	Isoflurane	9.4T		GE-EPI	BOLD	Biomap	Stimulus-evoked fMRI	Lab-made	GLM				Male
3/18/2019 16:33:19	156	Rat Sprague	16	Anesthesia free-breathing	Medetomidine	9.4T		GE-EPI	BOLD	FSL, AFNI	Stimulus-evoked fMRI	Lab-made	GLM, ROI				Male
3/18/2019 16:35:29	157	Mouse other		Anesthesia free-breathing	Isoflurane	9.4T		SE-EPI	BOLD	AFNI	Opto fMRI		GLM, ROI				Both
3/18/2019 16:38:44	158	Rat Sprague	7	Anesthesia free-breathing	Medetomidine	9.4T		GE-EPI	BOLD	FSL, AFNI	Resting-state fMRI		Seed-based				Male
3/18/2019 16:40:50	159	Rat other	8	Anesthesia ventilated	Î±-chloralose	9.4T		GE-EPI, SE-EPI	BOLD, CBV		Stimulus-evoked fMRI		GLM, ROI
3/18/2019 16:42:45	160	Rat Sprague	5	Anesthesia ventilated	Î±-chloralose	4.7T		FLASH	BOLD		Stimulus-evoked fMRI						Male
3/18/2019 16:45:33	161	Rabbit	40	Anesthesia free-breathing	Ketamine	3T or less		t1SE	MEMRI		Stimulus-evoked fMRI						Both
3/18/2019 16:47:05	162	Rat Sprague		Anesthesia ventilated	Î±-chloralose	11.7T		SE-EPI	BOLD	STIMULATE	Stimulus-evoked fMRI		GLM, ROI				Male
3/18/2019 16:51:32	163	Rat other	18	Anesthesia ventilated	Medetomidine	9.4T		GE-EPI	BOLD	AFNI	Stimulus-evoked fMRI, Resting-state fMRI	Lab-made	GLM, ROI, Seed-based				Male
3/18/2019 16:52:44	164	Rat Winstar	22	Anesthesia ventilated	Î±-chloralose	7T		GE-EPI	BOLD, CBF		Stimulus-evoked fMRI		ROI				Male
3/18/2019 16:55:10	165	Rat Winstar	12	Anesthesia free-breathing	Isoflurane	4.7T		GE-EPI	BOLD	BrainVoy- ager	Stimulus-evoked fMRI		GLM, ROI				Male
3/18/2019 16:56:52	166	Rhesus	1	Awake		4.7T		GE-EPI	BOLD	Vision Analyzer	Stimulus-evoked fMRI		ROI				Male
3/18/2019 16:59:27	167	Dog	6	Anesthesia free-breathing	Isoflurane, Propofol, Fentanyl, Combinations, midazolam	4.7T		GE-EPI	BOLD	Stimulate	Stimulus-evoked fMRI		GLM				Both
3/18/2019 17:03:00	168	Dog	8	Anesthesia free-breathing	Medetomidine, Ketamine, Combinations	3T or less		GE-EPI	BOLD	SPM, FSL	Stimulus-evoked fMRI	Lab-made	GLM				Both
3/18/2019 17:06:39	169	Rat Sprague	7	Anesthesia ventilated	Isoflurane	7T		GE-EPI	BOLD	Lab made	Opto fMRI		GLM				Male
3/18/2019 17:09:31	170	Rat Winstar	8	Anesthesia free-breathing	Isoflurane	4.7T		GE-EPI	BOLD	BrainVoyager	Deep-brain stimulation fMRI	Lab-made	GLM				Male
3/18/2019 17:12:35	171	Rat Long evans	5	Anesthesia free-breathing	Urethane	7T		GE-EPI			Resting-state fMRI		Seed-based				Male
3/18/2019 17:13:50	172														NA
3/18/2019 17:15:38	173	Rat Sprague	7	Anesthesia ventilated	Î±-chloralose	9.4T		GE-EPI	FLASH	EvIdent	Stimulus-evoked fMRI		GLM, ROI
3/18/2019 17:18:45	174	Rat Sprague	20	Anesthesia ventilated	Isoflurane	7T		GE-EPI	BOLD	SPM	Opto fMRI	Lab-made	GLM, ROI			contact author
3/18/2019 17:21:04	175	Rhesus	2	Anesthesia free-breathing	Medetomidine, Ketamine, Combinations	3T or less		GE-EPI	CBV	SPM	Stimulus-evoked fMRI	MACAQUE Saleem and Logothetis,	GLM				Male
3/23/2019 11:46:40	176	Rat Sprague		Anesthesia free-breathing	Isoflurane	4.7T		FSE	CBV	Paravision	Pharma fMRI		GLM, ROI				Male
3/23/2019 11:49:49	177	Mouse Black6	25	Anesthesia free-breathing	Medetomidine	9.4T		GE-EPI	BOLD	SPM, Lab made	Stimulus-evoked fMRI, Resting-state fMRI		GLM, ROI				Female
3/23/2019 11:52:49	178	Mouse Black6	31	Anesthesia ventilated	Isoflurane	4.7T		RARE	CBV	Biomap	Pharma fMRI		GLM, ROI				Male
3/23/2019 11:55:22	179	Rat Sprague	20	Anesthesia free-breathing	Urethane	3T or less		GE-EPI	BOLD		Pharma fMRI		GLM, ROI				Male
3/23/2019 11:58:27	180	Cat		Anesthesia ventilated	Isoflurane	4.7T, 9.4T		GE-EPI	BOLD		Stimulus-evoked fMRI		GLM, ROI
3/23/2019 12:02:23	181	Rhesus	5	Awake restrained		7T		GE-EPI	BOLD	FSL	Stimulus-evoked fMRI		GLM
3/23/2019 12:05:46	182	Rat Sprague	7	Anesthesia free-breathing	Isoflurane	9.4T		GE-EPI	BOLD	SPM	Resting-state fMRI		Seed-based				Male
3/23/2019 12:08:07	183	Mouse Black6	18	Anesthesia ventilated	Isoflurane, Medetomidine, Combinations	7T		GE-EPI	BOLD	FSL, ANTS	Resting-state fMRI	MOUSE Australian mouse brain mapping consortium (AMBMC)	Graph theory
3/23/2019 12:09:39	184	Rat Winstar	12	Awake		4.7T		FLASH	BOLD	SPM, Lab made	Stimulus-evoked fMRI		GLM, ROI				Male
3/23/2019 12:12:21	185	Rat other	3	Anesthesia free-breathing	Î±-chloralose	4.7T		FLASH	BOLD	SPM	Opto fMRI	Lab-made	GLM, ROI
3/23/2019 12:14:36	186	Rhesus	2	Awake		4.7T		GE-EPI	BOLD	Lab made, BrainVoyager	Stimulus-evoked fMRI		GLM, ROI				Male
3/23/2019 12:15:21	188														NA
3/23/2019 12:17:28	189	Zebra Finch		Anesthesia free-breathing	Isoflurane	7T		SE-EPI	BOLD		Stimulus-evoked fMRI		ROI
3/23/2019 12:20:33	190	Sheep	7	Anesthesia ventilated	Morphine + acepromaine	3T or less		GE-EPI, FLASH	BOLD	Lab made	Stimulus-evoked fMRI		GLM, ROI				Female
3/23/2019 12:25:00	191	Rhesus	3	Anesthesia ventilated	Isoflurane, Fentanyl, Combinations	4.7T		GE-EPI	BOLD	MEDx	Stimulus-evoked fMRI
3/23/2019 12:27:06	192	Rhesus	11	Anesthesia free-breathing	Propofol	3T or less		GE-EPI	BOLD	SPM	Resting-state fMRI	INIA19	ALFF				Female
3/23/2019 12:29:42	193	Rat Sprague	30	Anesthesia ventilated	Î±-chloralose	7T		SE-EPI	BOLD	SPM	Stimulus-evoked fMRI	Lab-made	GLM				Male
3/23/2019 12:32:42	194	Rat Sprague	8	Anesthesia free-breathing	Isoflurane, choral hydrate + pentobarbital	4.7T		GE-EPI	BOLD	SPM	Stimulus-evoked fMRI	Lab-made	GLM				Male
3/23/2019 12:35:54	195	Rat Sprague	14	Awake, Anesthesia free-breathing	chloral hydrate	3T or less		GE-EPI	BOLD, CBF		Stimulus-evoked fMRI		GLM				Male
3/23/2019 13:44:48	197	Cat	11	Anesthesia ventilated	Isoflurane	9.4T		GE-EPI	BOLD, CBV	STIMULATE	Stimulus-evoked fMRI		GLM, ROI				Female
3/23/2019 13:47:55	198	pig	5	Anesthesia free-breathing	Ketamine, Combinations, Stresnil	3T or less		GE-EPI	BOLD	SPM	Stimulus-evoked fMRI		GLM, ROI
3/23/2019 13:51:17	199	Rhesus	2	Anesthesia free-breathing	Medetomidine, Propofol, Combinations	4.7T		GE-EPI	BOLD	SPM	Deep-brain stimulation fMRI		GLM, ROI				Male
3/23/2019 13:54:52	196	Rat Sprague		Anesthesia ventilated	Î±-chloralose	11.7T		GE-EPI	BOLD, MEMRI	AFNI	Stimulus-evoked fMRI		GLM, ROI
3/24/2019 10:16:53	200	Rat Sprague	5	Awake restrained		4.7T		GE-EPI	CBF	STIMULATE	Stimulus-evoked fMRI		ROI				Male
3/24/2019 10:19:45	201	cynomolgus monkey	3	Awake		3T or less		GE-EPI	BOLD	BrainVoyagerQX	Stimulus-evoked fMRI		GLM, ROI				Male
3/24/2019 10:25:59	301	Rhesus	2	Awake restrained		3T or less		GE-EPI	CBV	SPM	Deep-brain stimulation fMRI	MACAQUE M12	GLM				Male
3/24/2019 10:28:16	302	Rhesus	2	Anesthesia free-breathing	Isoflurane	3T or less		GE-EPI	BOLD	BrainVoyager	Deep-brain stimulation fMRI		GLM, ROI				Male
3/24/2019 10:30:13	303	Cat	6	Anesthesia ventilated	Isoflurane	9.4T		GE-EPI	BOLD		Stimulus-evoked fMRI		GLM, ROI				Female
3/24/2019 10:32:48	304	Rat Sprague	33	Anesthesia ventilated	Î±-chloralose	9.4T		GE-EPI	BOLD	EvIdent	Stimulus-evoked fMRI		GLM, ROI				Male
3/24/2019 10:34:45	305	Rat Sprague		Anesthesia ventilated	Propofol	3T or less		GRASS			Stimulus-evoked fMRI		GLM, ROI				Female
3/24/2019 10:38:13	306	Rhesus	8	Awake, Anesthesia free-breathing		4.7T		GE-EPI	BOLD	Lab made	Deep-brain stimulation fMRI
3/24/2019 10:39:56	307	Rat Sprague	10	Anesthesia ventilated	Î±-chloralose	9.4T		SE-EPI	BOLD, CBF		Stimulus-evoked fMRI		GLM, ROI				Male
3/24/2019 10:42:25	308	Rat Sprague	6	Anesthesia ventilated	Halothane	4.7T		RARE	CBV		Pharma fMRI		ROI				Male
3/24/2019 11:25:30	309	Mouse other	19	Anesthesia ventilated	Isoflurane	4.7T		RARE	CBV		Pharma fMRI		GLM, ROI
3/24/2019 11:27:26	310	Rhesus	2	Awake		3T or less		GE-EPI	BOLD	SPM	Stimulus-evoked fMRI		GLM, ROI				Male
3/24/2019 11:39:22	311	Rhesus	3	Awake		3T or less		GE-EPI	CBV	SPM, Freesurfer	Stimulus-evoked fMRI		GLM				Male
3/24/2019 11:41:53	312	Rat Sprague	16	Anesthesia free-breathing	Medetomidine	4.7T		SE-EPI	BOLD	SPM	Stimulus-evoked fMRI		GLM, ROI				Male
3/24/2019 11:45:45	313	Rhesus	4	Awake		3T or less		GE-EPI	CBV	AFNI, Freesurfer	Stimulus-evoked fMRI		GLM, ROI
3/24/2019 11:48:38	314	Rat Winstar	12	Anesthesia ventilated	Isoflurane	4.7T		GE-EPI	BOLD	SPM, Lab made	Stimulus-evoked fMRI		GLM, ROI				Male
3/24/2019 11:51:36	315	Rat Sprague	15	Anesthesia ventilated	Î±-chloralose	7T		SE-EPI	diffusion		Stimulus-evoked fMRI		GLM, ROI				Male
3/24/2019 11:56:40	316	Mouse Black6, Mouse other	22	Awake restrained		9.4T		SE-EPI	BOLD	AFNI	Opto fMRI	Lab-made	GLM, ROI
3/24/2019 11:59:17	317	Rat Sprague	14	Anesthesia free-breathing	Isoflurane	9.4T		GE-EPI	BOLD	STIMULATE	Stimulus-evoked fMRI		GLM, ROI				Male
3/24/2019 12:01:38	318	capuchin monkeys	4	Anesthesia free-breathing	Propofol	3T or less		GE-EPI	BOLD	FSL	Stimulus-evoked fMRI		GLM, ROI		Jo reading list		Female
3/24/2019 12:10:33	320	Rat Sprague	10	Anesthesia free-breathing	Medetomidine	9.4T		GE-EPI	BOLD	Stimulate	Stimulus-evoked fMRI, Resting-state fMRI		GLM, ROI				Male
3/24/2019 12:08:32	319	Rat other	16	Anesthesia ventilated	Fentanyl, Combinations, haloperidol	7T		GE-EPI	BOLD	Lab made	Pharma fMRI		GLM, ROI				Female
3/28/2019 16:09:01	320	Rat Sprague	10	Anesthesia free-breathing	Medetomidine	9.4T		GE-EPI	BOLD	Lab made, Stimulate	Stimulus-evoked fMRI, Resting-state fMRI		GLM, ROI, Seed-based				Male
3/28/2019 16:12:00	321														NA
3/28/2019 16:15:53	323	Rat Long evans	11	Awake		7T		GE-EPI	BOLD	SPM	Opto fMRI		GLM, ROI
3/28/2019 16:12:31	322														NA
3/28/2019 16:18:38	324	Cat	5	Anesthesia free-breathing	Isoflurane, Ketamine, Combinations	7T		GE-EPI	BOLD	SPM	Stimulus-evoked fMRI		GLM		Jo reading list		Female
3/28/2019 16:24:39	326	Rhesus	10	Anesthesia ventilated	Combinations, remifentanil + mivacurium chloride	4.7T, 7T		GE-EPI	BOLD	Lab made	Pharma fMRI		GLM, ROI				Both
3/28/2019 16:21:19	325	Squirrel Monkey	8	Anesthesia ventilated	Isoflurane	9.4T		GE-EPI	BOLD	Lab made	Stimulus-evoked fMRI		GLM, ROI				Male
3/28/2019 16:27:24	327	Rat Sprague	8	Anesthesia free-breathing	Isoflurane	7T		bSSFP		Lab made	Stimulus-evoked fMRI		GLM				Male
3/28/2019 16:30:07	328	Rat Sprague	16	Anesthesia ventilated	Î±-chloralose	11.7T		SE-EPI	BOLD	STIMULATE	Stimulus-evoked fMRI		GLM				Male
3/28/2019 16:32:27	329	Rat other	13	Anesthesia ventilated	Isoflurane	4.7T		RARE	CBV		Pharma fMRI		ROI				Male
3/28/2019 16:36:38	330	Rhesus	10	Anesthesia free-breathing	Isoflurane	3T or less		GE-EPI	BOLD	FSL	Resting-state fMRI	INIA19	Dictionary learning				Both
3/28/2019 16:38:59	331	Rhesus	2	Awake restrained		3T or less		GE-EPI	CBV	SPM	Stimulus-evoked fMRI	Lab-made	GLM				Both
3/28/2019 16:40:50	332	Rabbit	2	Awake restrained		9.4T		GE-EPI	BOLD		Stimulus-evoked fMRI		GLM, ROI				Female
3/28/2019 16:44:03	333	Rat Winstar		Anesthesia free-breathing	Isoflurane	4.7T		GE-EPI	BOLD	BrainVoyager QX	Deep-brain stimulation fMRI		GLM, ROI				Male
3/28/2019 16:48:14	334	Pig	13	Anesthesia ventilated	Isoflurane	3T or less		GE-EPI	BOLD	BrainVoyager	Deep-brain stimulation fMRI	Pig Saikali	GLM, ROI				Male
3/28/2019 16:48:41	335														NA
3/28/2019 16:49:00	336														NA
3/28/2019 16:51:44	337	Rhesus	2	Awake restrained		3T or less		GE-EPI	BOLD	SPM	Stimulus-evoked fMRI	MACAQUE Saleem & Logothetis,	GLM, ROI				Male
3/28/2019 16:54:45	338	Marmoset	2	Awake		7T		GE-EPI	BOLD	FSL, AFNI, ITKSNAP	Stimulus-evoked fMRI	Lab-made	GLM, ROI				Male
3/28/2019 16:57:25	339	Rhesus	2	Awake		3T or less		GE-EPI	CBV		Stimulus-evoked fMRI		GLM, ROI				Male
3/29/2019 9:20:56	340	Mouse Black6, Mouse other		Anesthesia free-breathing	Medetomidine	9.4T		GE-EPI	BOLD	FSL, Lab made	Opto fMRI	MOUSE DURSQ (Toronto)	GLM, ROI				Male
3/29/2019 9:23:58	341	Rhesus	2	Awake restrained		3T or less		GE-EPI	CBV		Stimulus-evoked fMRI	Lab-made	GLM, ROI				Both
3/29/2019 9:27:06	342	Rat Sprague		Anesthesia free-breathing	Î±-chloralose	9.4T		GE-EPI, SE-EPI	BOLD		Stimulus-evoked fMRI		GLM, ROI				Male
3/29/2019 9:28:44	343	Rat Sprague	16	Anesthesia ventilated	Î±-chloralose	11.7T		GE-EPI	BOLD		Stimulus-evoked fMRI		GLM, ROI				Male
3/29/2019 9:32:51	344	Rat Sprague	6	Anesthesia ventilated	Î±-chloralose, morphine sulfate	7T		GE-EPI	BOLD, CBF		Stimulus-evoked fMRI		GLM				Male
3/29/2019 9:35:02	345	Rat Sprague		Anesthesia ventilated	Î±-chloralose	9.4T		GE-EPI	BOLD	Stimulate	Stimulus-evoked fMRI		GLM, ROI				Female
3/29/2019 9:36:42	346														NA
3/29/2019 9:39:54	347	Rat Sprague	38	Anesthesia free-breathing	Î±-chloralose	4.7T		FLASH	CBV, MEMRI	Lab made	Stimulus-evoked fMRI		GLM, ROI				Male
3/29/2019 9:42:56	348	Rat Sprague	20	Anesthesia ventilated	Isoflurane	4.7T		GE-EPI	BOLD	SPM, AFNI	Stimulus-evoked fMRI		GLM, ROI
3/29/2019 9:45:04	349	Rhesus	3	Awake		3T or less		GE-EPI	BOLD	Freesurfer	Stimulus-evoked fMRI		GLM				Male
3/29/2019 9:47:03	350	Cat	9	Anesthesia ventilated	Ketamine	3T or less		GE-EPI	BOLD	SPM	Stimulus-evoked fMRI		GLM, ROI
3/29/2019 9:49:03	351	Rat Winstar	11	Anesthesia free-breathing	Urethane	7T		GE-EPI	BOLD	Activis	Stimulus-evoked fMRI		GLM, ROI				Male
3/29/2019 9:50:07	352														NA
3/29/2019 9:52:19	353	Rhesus	1	Awake		7T		SE-EPI	BOLD	SPM, FSL, Lab made	Stimulus-evoked fMRI		SVM
3/29/2019 9:53:53	354	Rabbit	4	Awake restrained		4.7T		GE-EPI	BOLD	Lab made	Stimulus-evoked fMRI		ROI, Cluster				Female
3/29/2019 9:56:43	355	Rhesus	2	Awake		3T or less		GE-EPI	CBV	SPM	Stimulus-evoked fMRI	MACAQUE F99	GLM, ROI				Male
3/29/2019 9:58:56	356	Rat Winstar	20	Anesthesia ventilated	Medetomidine, Ketamine, Î±-chloralose, Combinations	7T		SE-EPI	BOLD	STIMULATE	Stimulus-evoked fMRI		GLM, ROI				Male
3/29/2019 10:00:06	357			Anesthesia free-breathing											NA
3/29/2019 10:03:25	358	Cat	10	Anesthesia ventilated	Isoflurane	9.4T		GE-EPI	BOLD, CBV	Lab made	Stimulus-evoked fMRI		GLM, ROI
3/29/2019 10:09:23	359	Cat	8	Anesthesia ventilated	Isoflurane	9.4T		GE-EPI	BOLD	FSL	Stimulus-evoked fMRI		GLM, ROI
3/29/2019 10:11:29	360	Rat Sprague	5	Anesthesia free-breathing	Urethane	9.4T		GEMS	BOLD	Lab made	Stimulus-evoked fMRI		GLM, ROI
3/29/2019 10:14:09	361	Rat Winstar	28	Anesthesia free-breathing	Medetomidine	4.7T		GE-EPI	BOLD	BrainVoyager QX	Deep-brain stimulation fMRI	Lab-made	GLM, ROI				Male
3/29/2019 10:20:04	362	Rat Winstar	10	Awake, Anesthesia ventilated	Medetomidine	7T		SE-EPI	BOLD	SPM	Pharma fMRI		GLM, ROI				Male
3/29/2019 10:22:19	363	Cat	10	Anesthesia ventilated	Isoflurane, Ketamine, Combinations	7T		GE-EPI	BOLD	SPM	Stimulus-evoked fMRI	Lab-made	GLM, ROI
3/29/2019 10:25:10	364	Rat Winstar	26	Anesthesia ventilated	Î±-chloralose	7T		GE-EPI	BOLD	SPM	Deep-brain stimulation fMRI	RAT Valdes-Herna ndez	GLM, ROI				Male
3/29/2019 10:26:49	365	Cat	13	Anesthesia ventilated	Isoflurane	9.4T		GE-EPI, SE-EPI	BOLD	STIMULATE	Stimulus-evoked fMRI		GLM, ROI				Female
3/29/2019 11:11:24	366	Rat Sprague	10	Anesthesia ventilated	Î±-chloralose	3T or less		SE-EPI	BOLD	Lab made	Pharma fMRI		GLM, ROI				Male
3/29/2019 11:20:42	367	Rat other	48	Anesthesia free-breathing		3T or less		GE-EPI	BOLD		Stimulus-evoked fMRI		ROI
3/29/2019 11:23:04	368	Rhesus	2	Awake		4.7T		GE-EPI	BOLD	FSL	Stimulus-evoked fMRI		GLM, ROI
3/29/2019 11:25:34	369	Rhesus	4	Anesthesia ventilated	remifentanyl	4.7T		GE-EPI	BOLD	Lab made	Stimulus-evoked fMRI		GLM, ROI
3/29/2019 11:28:17	370	Marmoset	5	Anesthesia free-breathing	Isoflurane	4.7T		RARE	BOLD	STIMULATE	Stimulus-evoked fMRI		GLM, ROI				Male
3/29/2019 11:30:30	371	Rat Sprague	10	Anesthesia ventilated	Î±-chloralose	11.7T		GE-EPI	BOLD	STIMULATE	Stimulus-evoked fMRI		GLM, ROI				Male
3/29/2019 11:33:20	372	Squirrel Monkey	6	Anesthesia free-breathing	Isoflurane	9.4T		GE-EPI	BOLD	Lab made	Stimulus-evoked fMRI, Resting-state fMRI		GLM, ROI
3/29/2019 11:35:21	373	Rhesus	3	Awake		4.7T		GE-EPI	BOLD	Lab made	Stimulus-evoked fMRI		GLM, ROI
3/29/2019 11:37:54	374	Rat Sprague	19	Anesthesia ventilated	Î±-chloralose	4.7T		GE-EPI	BOLD	SPM	Stimulus-evoked fMRI		GLM				Female
3/29/2019 11:43:31	375	Squirrel Monkey	11	Anesthesia ventilated	Isoflurane	9.4T		GE-EPI	BOLD	Lab made	Stimulus-evoked fMRI		GLM, ROI
3/29/2019 11:53:02	376	Mouse other	28	Anesthesia free-breathing	Medetomidine	7T		GE-EPI	BOLD	SPM	Resting-state fMRI	MOUSE Allen Institute for Brain Science (AIBS)	ICA, Network analysis				Male
3/29/2019 11:56:08	377	Rat Sprague	16	Anesthesia ventilated	Isoflurane	7T		GE-EPI	BOLD	SPM	Stimulus-evoked fMRI	Lab-made	GLM				Male
3/29/2019 11:57:44	378	Rhesus	3	Anesthesia free-breathing	Isoflurane	3T or less		GE-EPI	BOLD	FSL	Resting-state fMRI	Lab-made	Seed-based				Male
3/29/2019 12:00:38	379	Rat Winstar	5	Anesthesia free-breathing	Propofol	7T		FLASH	BOLD, CBF	Lab made	Stimulus-evoked fMRI		GLM, ROI				Female
3/29/2019 12:02:27	380	Rat Sprague	18	Anesthesia ventilated	Î±-chloralose	7T		GE-EPI	BOLD	Lab made	Stimulus-evoked fMRI		GLM, ROI				Male
3/29/2019 14:43:42	381	Rat Sprague	12	Anesthesia ventilated	Urethane	11.7T		GE-EPI	BOLD	AFNI	Resting-state fMRI		Seed-based				Male
3/29/2019 14:47:15	382	Rat Sprague	11	Anesthesia free-breathing	Medetomidine	4.7T		SE-EPI	BOLD	SPM	Stimulus-evoked fMRI		GLM, ROI				Male
3/29/2019 14:50:54	383	Mouse Black6	10	Anesthesia ventilated	Halothane	7T		GE-EPI	BOLD	FSL, AFNI	Resting-state fMRI	MOUSE DURSQ (Toronto)	Graph theory				Male
3/29/2019 14:54:00	384	Rat Winstar	8	Anesthesia free-breathing	Î±-chloralose	4.7T		FSE	BOLD	Lab made	Stimulus-evoked fMRI		GLM, ROI				Male
3/29/2019 14:56:17	385	Mouse Black6		Anesthesia free-breathing	Urethane	7T		FLASH	BOLD		Stimulus-evoked fMRI		GLM				Female
3/29/2019 15:06:15	386	Rat Sprague	6	Anesthesia ventilated	Isoflurane	7T		RARE	BOLD	SPM	Resting-state fMRI		GLM
3/29/2019 15:10:38	387	Rhesus	5	Anesthesia ventilated	Isoflurane	7T		GE-EPI	BOLD	FSL	Resting-state fMRI	MACAQUE F99	Seed-based, Network analysis, dFC				Both
3/29/2019 15:13:31	388	Rat Sprague	19	Anesthesia ventilated	Urethane	3T or less		GE-EPI	BOLD	AFNI	Pharma fMRI		GLM, ROI				Male
3/29/2019 15:17:27	389	Rat Sprague	4	Anesthesia free-breathing	Isoflurane, Medetomidine, Combinations	9.4T		GE-EPI	BOLD	Lab made	Stimulus-evoked fMRI		GLM, ROI				Male
3/29/2019 15:20:00	390	Rat Sprague		Anesthesia ventilated	Î±-chloralose	9.4T		RARE	BOLD	EvidentTM	Stimulus-evoked fMRI		GLM, ROI				Male
3/29/2019 15:24:48	391	Rat Winstar	131	Anesthesia ventilated	Isoflurane	7T		SE-EPI	diffusion	SPM	Stimulus-evoked fMRI		GLM				Male
3/29/2019 15:27:02	392	Rat Sprague	13	Anesthesia ventilated	Î±-chloralose	4.7T		RARE	BOLD	MRVision	Stimulus-evoked fMRI		GLM, ROI				Male
3/29/2019 15:30:43	393	prairie voles	14	Awake		7T		SE-EPI	BOLD	SPM	Stimulus-evoked fMRI	Lab-made	GLM, ROI				Male
3/29/2019 15:35:03	394	Rat Sprague	6	Anesthesia ventilated	Isoflurane	9.4T		bSSFP	BOLD	Lab made	Stimulus-evoked fMRI		GLM
3/29/2019 15:38:42	395	Rat Winstar	12	Anesthesia ventilated	Î±-chloralose	7T		GE-EPI	BOLD	SPM	Stimulus-evoked fMRI		GLM, ROI				Male
3/29/2019 15:43:46	396	Rat Sprague	13	Anesthesia free-breathing	Isoflurane, Medetomidine, Combinations	9.4T		GE-EPI	BOLD	SPM	Resting-state fMRI	Lab-made	Seed-based				Male
3/29/2019 15:45:31	397	Rhesus	3	Anesthesia free-breathing	Propofol	3T or less		GE-EPI	BOLD	SPM	Resting-state fMRI	MACAQUE INIA19	ReHo				Female
3/29/2019 15:47:42	398	Dog	6	Anesthesia free-breathing	Sumianxin	3T or less		GE-EPI	BOLD	SPM	Stimulus-evoked fMRI		GLM, ROI				Female
3/29/2019 15:51:16	399	Mouse Black6	13	Anesthesia free-breathing	Medetomidine	9.4T		FISP	BOLD	SPM	Stimulus-evoked fMRI		GLM, ROI				Both
3/29/2019 15:59:20	400	Rat Sprague	15	Anesthesia ventilated	Medetomidine	9.4T		GE-EPI	CBV	AFNI	Resting-state fMRI, Deep-brain stimulation fMRI, Opto fMRI		GLM, Network analysis				Male
3/29/2019 16:02:33	401	Rhesus	7	Anesthesia ventilated	remifentanil	7T		GE-EPI, ASL	BOLD, CBV, CBF	Lab made	Stimulus-evoked fMRI		GLM, ROI				Both
3/29/2019 16:07:15	402	Rat Winstar	39	Anesthesia free-breathing	Medetomidine	4.7T		GE-EPI	BOLD	BrainVoyager QX	Deep-brain stimulation fMRI		GLM, ROI				Male
3/29/2019 16:11:27	403	Rat Sprague	9	Anesthesia ventilated	Urethane	9.4T		SE-EPI	BOLD, CBV	SPM	Stimulus-evoked fMRI	Lab-made	GLM, ROI				Male
3/29/2019 16:17:14	404	Rat Sprague	30	Anesthesia ventilated	Isoflurane	7T		GRE	BOLD	MEDx	Stimulus-evoked fMRI		GLM, ROI
3/29/2019 16:20:21	405	Rhesus	7	Awake, Anesthesia ventilated	remifentanyl	4.7T, 7T		GE-EPI	BOLD	Lab made	Stimulus-evoked fMRI						Male
3/29/2019 16:38:30	406	Rat Sprague	4	Anesthesia ventilated	Î±-chloralose	9.4T		FSE	BOLD	Lab made	Stimulus-evoked fMRI		GLM, ROI
3/29/2019 16:41:34	407	Rhesus	3	Awake restrained		4.7T		GE-EPI	CBV	AFNI	Stimulus-evoked fMRI		GLM				Male
3/29/2019 16:44:05	408	Rhesus	3	Awake, Anesthesia ventilated	Fentanyl	4.7T, 7T		GE-EPI	BOLD	BrainVoyagerQX	Stimulus-evoked fMRI		GLM
3/29/2019 16:47:11	409	Rat Winstar		Anesthesia free-breathing	Isoflurane	9.4T		GE-EPI	BOLD		Pharma fMRI		GLM, ROI				Male
3/29/2019 16:50:03	410	Rat Sprague	46	Anesthesia free-breathing	Isoflurane	7T		GE-EPI	BOLD	FSL, AFNI	Resting-state fMRI	Lab-made	Seed-based	Non-parametric			Male
3/29/2019 16:56:57	411	Rhesus	2	Awake		4.7T		GE-EPI	BOLD	SPM	Stimulus-evoked fMRI		GLM, ROI				Both
3/29/2019 16:59:25	412	Rhesus	2	Awake		4.7T		GE-EPI	BOLD				GLM				Both
3/29/2019 17:00:27	414														NA		Male
3/29/2019 17:02:22	415	Rat Sprague	8	Anesthesia ventilated	Î±-chloralose	7T		SE-EPI	BOLD		Stimulus-evoked fMRI		ROI				Male
3/29/2019 17:02:40	416														NA
3/29/2019 17:05:09	417	Rat other	16	Awake		4.7T		GE-EPI	BOLD	SPM, Stimulate	Stimulus-evoked fMRI		GLM				Male
3/29/2019 17:07:30	418	Rhesus	2	Awake		4.7T		GE-EPI	BOLD	AFNI, Lab made	Stimulus-evoked fMRI		GLM, ROI				Male
3/29/2019 17:09:02	419	Rat Sprague	34	Anesthesia free-breathing	chloral hydrate	3T or less		GE-EPI	BOLD	SPM	Resting-state fMRI	RAT spmratIHEP	ReHo				Male
3/29/2019 17:11:42	420	Rhesus	11	Anesthesia ventilated	Isoflurane	7T		GE-EPI	BOLD	FSL	Resting-state fMRI	MACAQUE F99	Seed-based				Both
3/30/2019 8:38:39	421														NA
3/30/2019 8:39:42	422														NA
3/30/2019 8:43:17	423	Rat Sprague, Rat other		Anesthesia free-breathing	Isoflurane	4.7T		ASL	CBF		Stimulus-evoked fMRI						Male
3/30/2019 8:47:41	424	Rat Sprague		Anesthesia free-breathing, Anesthesia ventilated	Urethane, Halothane	11.7T		GE-EPI	BOLD		Stimulus-evoked fMRI		GLM, ROI				Male
3/30/2019 8:50:52	425	Rat other	20	Anesthesia free-breathing	Î±-chloralose	4.7T		GE	BOLD	SPM, FSL	Stimulus-evoked fMRI	Lab-made	GLM
3/30/2019 8:54:52	426	Rat Sprague	36	Anesthesia free-breathing	Isoflurane	7T		RARE	CBF	AFNI, ANTS	Resting-state fMRI	Lab-made	Seed-based				Male
3/30/2019 8:58:42	427	Mouse Black6	20	Anesthesia free-breathing	Isoflurane	9.4T		GE-EPI	BOLD	FSL	Stimulus-evoked fMRI		GLM				Male
3/30/2019 9:02:24	428	Rat Sprague	35	Anesthesia ventilated	Halothane	4.7T		RARE	CBV	FSL	Pharma fMRI	Lab-made	GLM, ROI				Male
3/30/2019 9:05:07	429	Rat other	16	Anesthesia free-breathing	chloral hydrate	3T or less		RARE	BOLD	SPM	Pharma fMRI	Lab-made	GLM, ROI				Male
3/30/2019 9:06:07	430	Mouse Black6	42	Anesthesia ventilated	Isoflurane, Medetomidine, Urethane, Propofol, Combinations	9.4T		GE-EPI	BOLD	FSL, AFNI, ANTS	Resting-state fMRI	MOUSE Australian mouse brain mapping consortium (AMBMC)	ReHo	Non-parametric		public repository	Female
3/30/2019 12:42:55	431	Rat other	27	Awake		7T		FSEPro	BOLD	SPM	Stimulus-evoked fMRI	RAT Valdes-Hernandez	GLM				Male
3/30/2019 12:45:52	432	Rabbit	4	Awake restrained		9.4T		GE-EPI	BOLD		Stimulus-evoked fMRI, Opto fMRI		GLM, ROI				Female
3/30/2019 12:47:54	433	Rhesus	2	Awake				GE-EPI	BOLD	Lab made	Stimulus-evoked fMRI		GLM, ROI
3/30/2019 12:49:57	434	Mouse Black6, Rat Sprague	14	Anesthesia free-breathing	Medetomidine	9.4T		GE-EPI	BOLD	SPM	Resting-state fMRI	Lab-made	ICA				Male
3/30/2019 12:51:56	435	Rat Winstar	3	Anesthesia free-breathing	Î±-chloralose	7T		GE-EPI	BOLD	Lab made	Stimulus-evoked fMRI	Lab-made	GLM				Male
3/30/2019 13:03:17	438	Dog	43	Awake		3T or less		GE-EPI	BOLD	AFNI	Stimulus-evoked fMRI	Lab-made	GLM, ROI				Both
3/30/2019 12:55:20	436	Rat Sprague	22	Anesthesia ventilated	Î±-chloralose	9.4T		GE-EPI	BOLD	(Valdes-Hernandez	Stimulus-evoked fMRI		GLM, ROI				Male
3/30/2019 12:56:19	437														NA
2019-12-04 16:13:51	438	Dog	50	Awake		3T or less		GE-EPI	BOLD	AFNI, ANTS	Stimulus-evoked fMRI	Lab-made	GLM, ROI				Both
2019-12-04 16:18:24	439	Rat Sprague	34	Anesthesia free-breathing	Isoflurane, Medetomidine, Combinations	9.4T		GE-EPI	BOLD	AFNI	Resting-state fMRI	Lab-made	Network analysis, Graph theory				Male
2019-12-04 16:20:53	440	Rat Sprague	5	Anesthesia ventilated	Î±-chloralose	9.4T		GE-EPI	BOLD		Resting-state fMRI		ROI				Male
2019-12-04 16:25:20	441	Rat Sprague	9	Anesthesia ventilated	Halothane	3T or less		GE-EPI	CBV		Pharma fMRI	Lab-made	GLM, ROI				Male
2019-12-04 16:28:36	442	Rat Sprague	41	Anesthesia free-breathing	Halothane	3T or less		RARE	BOLD	SPM, Medx	Pharma fMRI	Lab-made	GLM, ROI				Male
2019-12-04 16:32:13	443	Rat other	19	Anesthesia free-breathing	Medetomidine	9.4T		GE-EPI	BOLD	SPM, FSL, Lab made	Opto fMRI	RAT Schwarz	Network analysis				Male
2019-12-04 16:35:14	444	Rat Sprague	7	Awake, Anesthesia free-breathing	Isoflurane	4.7T		ASL	BOLD, CBF	Lab made, STIMULATE	Stimulus-evoked fMRI		GLM, ROI
2019-12-04 16:38:26	445	Rat Long evans	8	Anesthesia free-breathing	Î±-chloralose, pentobarbital	3T or less		GE-EPI	BOLD	FACT	Stimulus-evoked fMRI		GLM, ROI
2019-12-04 16:41:13	446	Rhesus	3	Anesthesia ventilated	remifentanyl	4.7T		GE-EPI	BOLD	Lab made	Stimulus-evoked fMRI		GLM				Both
2019-12-04 16:44:26	447	Rat Sprague	7	Anesthesia free-breathing	Isoflurane, Medetomidine, Combinations	7T		GE-EPI	BOLD	FSL, AFNI, Lab made	Resting-state fMRI	RAT Valde Ìs-Herna Ìndez	GLM, ICA
2019-12-04 16:47:43	448	Rat Sprague	28	Anesthesia ventilated	Isoflurane	7T		GE-EPI	CBV	SPM, Lab made	Stimulus-evoked fMRI		GLM, ROI				Male
2019-12-04 16:53:59	449	Rat Sprague	10	Anesthesia free-breathing	Isoflurane	7T		SE-EPI	BOLD	SPM	Stimulus-evoked fMRI		GLM, ROI				Male
2019-12-04 16:56:52	450	Mouse Black6	60	Anesthesia ventilated	Isoflurane	9.4T		GE-EPI	BOLD	SPM	Stimulus-evoked fMRI	Lab-made	GLM, ROI				Female
2019-12-04 16:59:13	451	Rat Sprague	3	Anesthesia free-breathing	Isoflurane	7T		GE-EPI	CBV		Stimulus-evoked fMRI		ROI				Male
2019-12-04 17:01:56	452	Zebra Finch	7	Anesthesia free-breathing	Medetomidine	7T		FLASH	BOLD	MEDx	Stimulus-evoked fMRI		GLM, ROI				Male
4/21/2019 12:26:42	453	Rat other	18	Anesthesia ventilated	Urethane	3T or less		GE-EPI	BOLD	SPM	Stimulus-evoked fMRI		GLM, ROI				Female
4/21/2019 12:29:31	454	Rat other	20	Anesthesia free-breathing	Urethane	4.7T		GE	BOLD	SPM, FSL	Stimulus-evoked fMRI	Lab-made	GLM, ROI				Male
4/21/2019 12:34:16	455	Rat Sprague	20	Anesthesia free-breathing	Isoflurane	4.7T		GE	BOLD	Lab made	Resting-state fMRI	Lab-made	Seed-based	Non-parametric			Male
4/21/2019 12:38:11	456	Cat	6	Anesthesia ventilated	Isoflurane	9.4T		GE-EPI, SE-EPI	BOLD, CBV	Lab made	Stimulus-evoked fMRI		GLM, ROI
4/21/2019 12:42:05	457	Rat Sprague	16	Anesthesia ventilated	Isoflurane, Medetomidine, Combinations	9.4T		GE-EPI	CBV	SPM, AFNI, Lab made	Deep-brain stimulation fMRI	RAT Valdes-Hernandez	GLM, ROI, Network analysis				Male
4/21/2019 12:45:01	458	Cat	4	Anesthesia ventilated	Isoflurane	9.4T		GE	BOLD, CBV	Lab made, Stimulate	Stimulus-evoked fMRI		ROI
4/21/2019 12:49:19	459	Rat Winstar	10	Awake restrained		4.7T		GE	BOLD		Stimulus-evoked fMRI		GLM, ROI				Male
4/21/2019 12:53:29	461	Rat Sprague	31	Anesthesia ventilated	Î±-chloralose	4.7T		GE-EPI	BOLD	Stimulate	Stimulus-evoked fMRI		GLM, ROI
4/21/2019 12:56:41	462	Rat Sprague	13	Anesthesia ventilated	Î±-chloralose	9.4T		GE-EPI	BOLD	AFNI, Lab made	Resting-state fMRI		Network analysis, causality				Male
4/21/2019 12:59:44	464	Rat Winstar	12	Anesthesia free-breathing	Medetomidine	7T, 11.7T		GE-EPI, SE-EPI	BOLD	STIMULATE	Stimulus-evoked fMRI		GLM, ROI				Male
4/21/2019 13:02:12	465	Rat Sprague	24	Anesthesia free-breathing	Isoflurane	7T		GE-EPI	BOLD	SPM	Stimulus-evoked fMRI	Lab-made	GLM, ROI				Female
4/21/2019 13:04:15	466	Rat Sprague	13	Anesthesia free-breathing	Isoflurane	7T		GE-EPI	BOLD	SPM	Stimulus-evoked fMRI	Lab-made	GLM, ROI				Female
4/21/2019 13:06:57	467	Rat Sprague	7	Anesthesia free-breathing	Isoflurane	9.4T		GE-EPI	BOLD	SPM	Resting-state fMRI		dFC				Male
4/21/2019 13:10:23	468	rabbit	6	Anesthesia free-breathing	Ketamine, Combinations, xylazine	3T or less		GE-EPI	BOLD		Deep-brain stimulation fMRI		ROI				Female
4/21/2019 13:15:28	469	rabbit	13	Anesthesia free-breathing	Isoflurane, Fentanyl, Combinations	4.7T		GE-EPI	BOLD	ITK	Stimulus-evoked fMRI		GLM, ROI				Female
4/21/2019 13:17:41	470	Mouse Black6	20	Anesthesia ventilated	Isoflurane	9.4T		GE-EPI	BOLD	Biomap	Stimulus-evoked fMRI		GLM, ROI				Female
4/21/2019 13:21:20	471	Rat Long evans		Anesthesia ventilated	Urethane	11.7T		GE-EPI	BOLD	Lab made	Stimulus-evoked fMRI		GLM, ROI				Male
4/21/2019 13:21:56	472														NA
4/21/2019 13:24:17	473	Cat	8	Anesthesia ventilated	Î±-chloralose	4.7T		Hahn SE	BOLD		Stimulus-evoked fMRI		GLM, ROI				Both
4/21/2019 13:28:00	474	Mouse other	20	Anesthesia free-breathing	Isoflurane	9.4T		GE-EPI	CBV		Resting-state fMRI		ROI
4/21/2019 13:30:57	475	Rat Sprague	15	Awake restrained		4.7T		GE-EPI	BOLD	FSL	Resting-state fMRI	Lab-made	ICA				Male
4/21/2019 13:33:38	476		14	Anesthesia free-breathing	Urethane	4.7T		GE-EPI	BOLD	SPM, Lab made	Stimulus-evoked fMRI		GLM, ROI				Male
4/21/2019 13:38:33	477	Rat Sprague		Anesthesia free-breathing	Ketamine	3T or less		GRE	CBV	AFNI	Stimulus-evoked fMRI		GLM, ROI				Male
4/21/2019 13:40:18	478	pig	12	Awake restrained		3T or less		GE-EPI	BOLD	AFNI	Stimulus-evoked fMRI		GLM, ROI				Female
4/21/2019 13:44:22	479	Rat Winstar	9	Anesthesia ventilated	Isoflurane, Propofol, Halothane	7T		SE-EPI	BOLD	FUNTool	Stimulus-evoked fMRI		GLM				Male
4/21/2019 13:45:31	480														NA
4/21/2019 13:50:05	481	Rhesus	3	Anesthesia free-breathing	Isoflurane			GE-EPI	BOLD	FSL	Resting-state fMRI	MACAQUE MNI	Network analysis				Female
4/21/2019 13:53:26	482	Rhesus	20	Anesthesia free-breathing	Isoflurane	3T or less		GE-EPI	BOLD	FSL	Resting-state fMRI		Seed-based				Both
4/21/2019 13:58:14	483	Rat Long evans		Anesthesia ventilated	Propofol	9.4T		GE-EPI	CBV	AFNI	Pharma fMRI	Lab-made	GLM, ROI
4/21/2019 14:00:58	484	Rhesus	1	Anesthesia ventilated	Isoflurane, Fentanyl, Combinations	4.7T		GE-EPI	BOLD	Lab made	Stimulus-evoked fMRI		GLM, ROI
4/21/2019 14:02:55	485	Rat Sprague	16	Anesthesia ventilated	Isoflurane	7T		GE-EPI	BOLD, CBF	Lab made, STIMULATE	Stimulus-evoked fMRI		GLM, ROI				Male
4/21/2019 14:06:16	486	Rat Winstar	20	Anesthesia ventilated	Isoflurane, Medetomidine	9.4T		SE-EPI	BOLD	Lab made	Resting-state fMRI						Male
4/21/2019 14:09:13	487		24	Anesthesia free-breathing	Isoflurane	7T		GE	BOLD		Stimulus-evoked fMRI		GLM				Female
4/21/2019 14:11:53	488	Rat Winstar	6	Awake restrained		4.7T		GE	BOLD	SPM	Stimulus-evoked fMRI	Lab-made	GLM				Male
4/21/2019 14:14:54	489	Rat Sprague	9	Anesthesia ventilated	Î±-chloralose	11.7T		GE	BOLD		Stimulus-evoked fMRI		GLM, ROI				Male
4/21/2019 14:17:07	490	Rat Sprague	11	Anesthesia ventilated	Halothane	7T		FLASH	BOLD	FSL, AFNI	Pharma fMRI		GLM, ROI				Male
4/21/2019 14:20:58	491	Cat	5	Anesthesia ventilated	Isoflurane, Ketamine, Combinations	7T		GE-EPI	BOLD	SPM	Stimulus-evoked fMRI		GLM
4/21/2019 14:24:42	492	Rhesus	14	Anesthesia ventilated	Isoflurane	3T or less		GE-EPI	BOLD		Resting-state fMRI		Seed-based, ALFF				Both
4/21/2019 14:28:57	493	Other Monkey	20	Anesthesia ventilated	Ketamine	3T or less		GE-EPI	BOLD	FSL	Resting-state fMRI	Lab-made	ICA	Non-parametric			Both
4/21/2019 14:32:23	494	Rat Sprague	6	Anesthesia free-breathing	Isoflurane	9.4T		GE-EPI	BOLD	Lab made	Stimulus-evoked fMRI, Resting-state fMRI	Lab-made	GLM, ROI, ICA
4/21/2019 14:37:28	495	Rat Winstar	13	Anesthesia ventilated	Urethane	7T		SE-EPI	BOLD	SPM, Lab made	Resting-state fMRI	Lab-made	Seed-based, Graph theory				Male
4/21/2019 14:39:25	496	Mouse Black6	15	Anesthesia ventilated	Isoflurane	9.4T		GE-EPI	BOLD	Biomap	Stimulus-evoked fMRI		GLM, ROI				Female
4/21/2019 14:43:43	497	Rhesus	3	Anesthesia ventilated	Isoflurane, Fentanyl, Combinations	3T or less		GE-EPI	CBV	BrainVoyagerQX	Stimulus-evoked fMRI		GLM				Both
4/21/2019 14:47:22	498	Rat Winstar	41	Anesthesia free-breathing	Î±-chloralose	7T		GE	BOLD, CBV	MEDx	Stimulus-evoked fMRI		GLM				Male
4/21/2019 14:49:58	499	Rat Sprague	17	Anesthesia ventilated	Isoflurane	9.4T		GE-EPI	BOLD		Stimulus-evoked fMRI		GLM, ROI				Male
4/21/2019 14:51:39	500														NA
4/21/2019 15:32:17	501	Cat	10	Anesthesia ventilated	Isoflurane	9.4T		ME-EPI	BOLD, CBV	Stimulate	Stimulus-evoked fMRI		GLM, ROI				Female
4/21/2019 15:35:40	502	Marmoset	4	Awake		7T		ME-EPI	BOLD	AFNI, Lab made	Stimulus-evoked fMRI		GLM, ROI				Male
4/21/2019 15:38:05	503	Rhesus	7	Anesthesia ventilated	Isoflurane, Fentanyl	4.7T		GE-EPI	BOLD	Lab made	Stimulus-evoked fMRI		GLM, ROI
4/21/2019 15:41:30	504	Other Monkey	12	Anesthesia free-breathing	Ketamine	3T or less			BOLD	SPM	Stimulus-evoked fMRI	Lab-made	GLM, ROI				Male
4/21/2019 15:46:06	505	Rat Sprague	18	Anesthesia ventilated	Î±-chloralose	9.4T		GE	BOLD	EvIdent	Stimulus-evoked fMRI		GLM, ROI
4/21/2019 15:51:40	506	Mouse Black6	80	Anesthesia free-breathing	Isoflurane	7T		GE-EPI	BOLD	SPM	Resting-state fMRI	MOUSE spmratHEPC	ALFF				Male
4/21/2019 15:54:45	507	Rat Sprague	18	Anesthesia ventilated	Isoflurane	4.7T		GE-EPI	BOLD, MEMRI		Resting-state fMRI	Lab-made	Seed-based, Network analysis				Male
4/21/2019 15:55:29	508														NA
4/21/2019 15:58:37	509	Rat Sprague	15	Anesthesia ventilated	Î±-chloralose	3T or less		SE-EPI	BOLD	Lab made	Pharma fMRI		GLM, ROI				Male
4/21/2019 16:01:49	510	Rat Sprague	20	Anesthesia free-breathing	Medetomidine	9.4T		GE-EPI	BOLD	SPM	Resting-state fMRI	Lab-made	Seed-based, ICA				Male
4/21/2019 16:04:51	511	Rat Winstar		Anesthesia free-breathing	Urethane	7T		GE-EPI	BOLD	SPM	Opto fMRI		GLM
4/21/2019 16:08:52	512	Rhesus	4	Awake restrained		3T or less		ME-EPI	CBV	AFNI, Lab made	Stimulus-evoked fMRI		GLM				Male
4/21/2019 16:11:18	513	rabbit	10	Awake restrained		4.7T		GE-EPI	BOLD	Lab made	Stimulus-evoked fMRI		GLM, ROI				Female
4/21/2019 16:14:12	514	Rat Sprague	12	Anesthesia free-breathing	Isoflurane	9.4T		SE-EPI		SPM	Deep-brain stimulation fMRI		GLM, ROI				Male
4/21/2019 16:17:42	515	Rat other	18	Anesthesia free-breathing	Isoflurane	4.7T		GE	BOLD	Lab made	Stimulus-evoked fMRI		ROI				Male
4/21/2019 16:23:42	516	Squirrel Monkey	4	Anesthesia ventilated	Isoflurane	9.4T		GE-EPI	BOLD	AFNI	Stimulus-evoked fMRI, Resting-state fMRI		GLM, Seed-based				Male
4/21/2019 16:25:57	517	Mouse Black6	92	Anesthesia ventilated	Isoflurane, Medetomidine, Combinations	9.4T		GE-EPI, ME-EPI	BOLD	FSL, AFNI	Resting-state fMRI	MOUSE Australian mouse brain mapping consortium (AMBMC)	dual-regression, dFC	Non-parametric		public repository	Both
4/21/2019 16:54:47	518	Rat Sprague	11	Anesthesia ventilated	Isoflurane	11.7T		GE-EPI	BOLD, CBV		Stimulus-evoked fMRI		GLM, ROI				Male
4/21/2019 16:58:31	519	Cat	20	Anesthesia ventilated	Isoflurane	9.4T		GE-EPI	BOLD	STIMULATE	Stimulus-evoked fMRI		GLM, ROI
4/21/2019 17:02:47	520	Rhesus	3	Anesthesia ventilated	remifentanil	4.7T		GE-EPI	BOLD, CBV	Lab made	Stimulus-evoked fMRI		GLM, ROI				Male
4/21/2019 17:20:06	521	Rhesus	4	Anesthesia free-breathing	Ketamine, Combinations, xylazine	3T or less		GE-EPI	BOLD	SPM	Stimulus-evoked fMRI		GLM, ROI				Male
4/21/2019 17:22:32	522	Rhesus	6	Anesthesia ventilated	Isoflurane	7T		GE-EPI	BOLD	FSL	Resting-state fMRI	MACAQUE F99	Network analysis				Both
4/21/2019 18:36:44	523	Rhesus	4	Awake		3T or less		GE-EPI	CBV	SPM	Stimulus-evoked fMRI	Lab-made	GLM, ROI				Both
4/21/2019 18:39:54	524	Rat Winstar	12	Anesthesia free-breathing	Isoflurane	7T		SE-EPI	BOLD	SPM	Stimulus-evoked fMRI		GLM, ROI				Male
4/21/2019 18:49:19		Rat Sprague	14	Anesthesia free-breathing	Î±-chloralose	11.7T		GE-EPI	BOLD, CBV		Stimulus-evoked fMRI		GLM, ROI				Male
4/21/2019 18:56:39	526	Rat Sprague	20	Awake restrained		4.7T			FSE	AFNI	Pharma fMRI	Lab-made	GLM, ROI				Male
4/21/2019 18:59:12	527	mustached bats	3	Awake		7T		GE	BOLD	MEDx	Stimulus-evoked fMRI		GLM
4/21/2019 19:02:08	528	Rat Sprague		Anesthesia free-breathing	Î±-chloralose	9.4T		GE	BOLD	SPM	Stimulus-evoked fMRI	Lab-made	GLM
4/21/2019 19:04:52	529	Rat Winstar	10	Anesthesia ventilated	Isoflurane	7T		RARE	BOLD		Pharma fMRI		ROI				Male
4/21/2019 19:07:33	530	Rat Sprague	18	Anesthesia free-breathing	Medetomidine	9.4T		GE-EPI	BOLD	SPM, FSL, AFNI	Resting-state fMRI	RAT Schwarz	Seed-based				Male
4/21/2019 19:11:21	531	Rat other	30	Anesthesia free-breathing	chloral hydrate	7T		FLASH	BOLD	CCHIPS	Stimulus-evoked fMRI		GLM, ROI				Male
4/21/2019 19:14:13	532	Rat Sprague	12	Anesthesia free-breathing	Î±-chloralose	7T		GE-EPI	BOLD	SPM	Stimulus-evoked fMRI	Lab-made	GLM				Female
4/21/2019 19:16:21	533	Rhesus	2	Awake		4.7T		GE-EPI	BOLD	SPM	Stimulus-evoked fMRI	Lab-made	GLM, ROI				Male
4/21/2019 19:20:40	534	Rat Long evans	17	Awake		7T		GE-EPI	BOLD	SPM	Resting-state fMRI	RAT Swanson 2004	Seed-based, Network analysis				Male
4/21/2019 19:23:03	535	Rat Sprague	12	Anesthesia ventilated	Urethane	3T or less		GE-EPI	BOLD		Pharma fMRI		ROI				Male
4/21/2019 19:25:13	536	Rat Sprague	8	Anesthesia free-breathing	Urethane	4.7T		GE-EPI	BOLD	SPM, Lab made	Deep-brain stimulation fMRI		GLM, ROI				Male
4/21/2019 19:28:34	537	Rat Sprague	17	Anesthesia free-breathing	Isoflurane	7T		SE-EPI	BOLD	SPM	Stimulus-evoked fMRI	Lab-made	GLM, ROI				Female
4/21/2019 19:32:10	538	Rat other	18	Anesthesia free-breathing	Isoflurane, Medetomidine, Combinations	4.7T		GE-EPI	BOLD	Brainvoyager	Resting-state fMRI	Lab-made	GLM, ROI				Both
4/21/2019 19:37:04	539	Rat Long evans		Awake restrained		4.7T		RARE	BOLD	Lab made	Stimulus-evoked fMRI	Lab-made	GLM				Both
4/21/2019 19:41:01	540	Rat Winstar	12	Anesthesia free-breathing	chloral hydrate	3T or less		T1SE	MEMRI	SPM	Stimulus-evoked fMRI	Lab-made	ROI				Male
4/21/2019 19:44:51	541	Mouse other	20	Anesthesia free-breathing	Ketamine						Stimulus-evoked fMRI				NA
4/21/2019 19:47:16	542	Rat Sprague	5	Anesthesia ventilated	pentobarbital	3T or less		GE-EPI	BOLD		Stimulus-evoked fMRI		GLM, ROI				Male
4/21/2019 19:51:03	543	Rat Long evans	8	Anesthesia free-breathing	Medetomidine	7T		GE	BOLD	Medx	Stimulus-evoked fMRI		GLM, ROI				Male
4/21/2019 19:53:40	544	Rat Sprague	24	Anesthesia ventilated	Î±-chloralose	7T		FSE	BOLD	Lab made	Stimulus-evoked fMRI		GLM, ROI
4/21/2019 19:56:38	545	Rat Sprague	18	Anesthesia ventilated	Î±-chloralose	3T or less		GE-EPI	CBV		Stimulus-evoked fMRI		GLM, ROI				Male
4/21/2019 20:02:12	546	Rat Sprague		Anesthesia free-breathing	Medetomidine	9.4T		GE-EPI	BOLD	SPM	Stimulus-evoked fMRI	RAT Nie et al., 2013	GLM, ROI				Male
4/21/2019 20:06:21	547	Rat Sprague	5	Anesthesia ventilated	Medetomidine	9.4T		GE-EPI	BOLD	FSL	Stimulus-evoked fMRI	Lab-made	GLM, ROI				Male
4/21/2019 20:09:01	548	Rhesus	5	Anesthesia ventilated	remifentanil	7T		GE-EPI, SE-EPI	BOLD	Lab made	Stimulus-evoked fMRI		GLM, ROI
4/21/2019 20:12:26	549	Rat Sprague	7	Anesthesia ventilated	Î±-chloralose	9.4T		GE-EPI	BOLD, CBF, MEMRI	STIMULATE	Stimulus-evoked fMRI		GLM, ROI				Male
4/21/2019 20:15:32	550	Rhesus	6	Anesthesia ventilated	Isoflurane	7T		GE-EPI	BOLD	FSL	Resting-state fMRI	MACAQUE F99	GLM				Both
4/21/2019 20:35:13	551	Rat Sprague	37	Anesthesia free-breathing	Isoflurane	3T or less		RARE	BOLD	SPM	Stimulus-evoked fMRI	Lab-made	GLM, ROI
4/21/2019 20:37:54	552	Mouse Black6, Mouse other	26	Anesthesia ventilated	Isoflurane	9.4T		GE-EPI	BOLD	SPM	Pharma fMRI		ROI				Male
4/21/2019 20:39:38	553	Rhesus	9	Anesthesia ventilated	Isoflurane, Fentanyl, Combinations	4.7T		GE-EPI	BOLD	Lab made	Stimulus-evoked fMRI		GLM, ROI				Both
4/21/2019 20:42:02	554	Rhesus	5	Anesthesia free-breathing	Propofol	3T or less		GE-EPI	BOLD	SPM	Stimulus-evoked fMRI	MACAQUE McLaren 2009	GLM, ROI				Female
4/21/2019 20:45:54	555	Rat Winstar		Anesthesia free-breathing	Medetomidine	4.7T		GE-EPI	BOLD	BrainVoyager	Deep-brain stimulation fMRI		GLM, ROI				Male
4/21/2019 20:48:10	556	Mouse Black6	18	Awake restrained		4.7T		FLASH	BOLD	SPM, Lab made	Stimulus-evoked fMRI	Lab-made	GLM, ROI				Male
4/21/2019 20:51:35	557	rabbit	19	Anesthesia free-breathing	Ketamine, Combinations, Xylazine	3T or less		GE-EPI	BOLD	SPM	Stimulus-evoked fMRI		GLM				Male
4/21/2019 20:57:46	558	Rat Sprague		Anesthesia free-breathing	Isoflurane	7T		GE-EPI	BOLD	SPM	Resting-state fMRI	RAT Nie 2013	GLM, ROI
4/21/2019 21:00:10	559	Rhesus	3	Awake restrained		3T or less		GE-EPI	CBV	Freesurfer	Stimulus-evoked fMRI	Lab-made	GLM, ROI				Male
4/21/2019 21:05:15	560	Rat Winstar		Anesthesia free-breathing	Isoflurane, Medetomidine, Î±-chloralose	4.7T		GE-EPI	BOLD	BrainVoyager	Deep-brain stimulation fMRI		ROI				Male
4/21/2019 21:06:59	561	Cat	9	Anesthesia free-breathing	Isoflurane	9.4T		FLASH	BOLD, CBV	Lab made, STIMULATE	Stimulus-evoked fMRI		GLM, ROI
4/21/2019 21:09:54	562	Rat Sprague	10	Anesthesia ventilated	Isoflurane	9.4T		GE-EPI	BOLD	Lab made	Resting-state fMRI		Seed-based				Male
4/21/2019 21:11:39	563	Rhesus	2	Awake		3T or less		GE-EPI	CBV	Freesurfer	Stimulus-evoked fMRI		GLM, ROI
4/21/2019 21:15:30	2002	Rhesus	2	Anesthesia free-breathing	Isoflurane, Fentanyl, Combinations	4.7T		GE-EPI	BOLD	Lab made	Stimulus-evoked fMRI		GLM, ROI
4/21/2019 21:17:46	565	Rhesus	3	Awake restrained		4.7T		GE-EPI	BOLD	SPM	Stimulus-evoked fMRI		GLM				Male
4/21/2019 21:22:03	566	Mouse Black6, Mouse other	27	Anesthesia free-breathing	Ketamine, Combinations, Xylazine	3T or less		GE	BOLD	BrainVISA	Pharma fMRI	Lab-made	GLM, ROI				Male
4/21/2019 21:24:12	567	Rat Winstar		Anesthesia free-breathing	Isoflurane	9.4T		GE-EPI	BOLD	Lab made, Biomap	Stimulus-evoked fMRI		GLM
4/21/2019 21:25:58	568	Rhesus	3	Awake		3T or less		GE-EPI	BOLD	Freesurfer, Lab made	Stimulus-evoked fMRI		GLM, ROI				Male
4/21/2019 21:29:24	569	Mouse Black6, Mouse other	152	Anesthesia free-breathing	Isoflurane, Medetomidine, Combinations	9.4T		GE-EPI	BOLD	SPM	Resting-state fMRI	Lab-made	ICA, Network analysis				Female
4/21/2019 21:34:08	570	Rat Sprague		Anesthesia ventilated	Isoflurane	7T		GE-EPI	BOLD	mrVISTA	Opto fMRI		GLM, ROI	Non-parametric			Female
4/21/2019 21:40:20	571	Rat Sprague	70	Anesthesia ventilated	Medetomidine	7T		GE-EPI	BOLD	SPM	Resting-state fMRI	Lab-made	Seed-based			contact author	Both
4/21/2019 21:43:40	572	Rat Winstar	22	Anesthesia free-breathing	Î±-chloralose	4.7T		GE-EPI	CBV		Stimulus-evoked fMRI		GLM				Male
4/21/2019 21:45:40	573	Rat Sprague	6	Anesthesia ventilated	Î±-chloralose	11.7T		GE-EPI	CBV		Stimulus-evoked fMRI		ROI
4/21/2019 21:46:51	574														NA
4/21/2019 21:49:58	575	Rat Long evans		Awake restrained		4.7T		RARE	BOLD		Pharma fMRI	RAT Ferris 2008	GLM				Male
4/21/2019 21:53:20	576	Rat Sprague	30	Anesthesia ventilated	Halothane	4.7T		RARE	CBV	FSL	Pharma fMRI	RAT Schwarz	GLM, ROI				Male
4/21/2019 21:56:05	577	Rat Sprague	10	Anesthesia ventilated	Halothane	9.4T		GE	BOLD, CBF		Stimulus-evoked fMRI		GLM, ROI				Male
4/21/2019 21:59:38	578	Rat Sprague	31	Anesthesia ventilated	Î±-chloralose	3T or less		GE-EPI	CBV		Stimulus-evoked fMRI		GLM, ROI				Male
4/21/2019 22:02:29	579	Squirrel Monkey	8	Anesthesia ventilated	Isoflurane	9.4T		GE-EPI	BOLD		Resting-state fMRI		Network analysis
4/21/2019 22:06:20	580	Rat Sprague	6	Anesthesia ventilated	Isoflurane	7T		GE-EPI	BOLD	SPM	Stimulus-evoked fMRI		GLM, ROI				Male
4/21/2019 22:10:33	581	Rat Long evans	20	Awake		7T		FSE	BOLD	Lab made	Pharma fMRI	RAT Swanson 1999	GLM, ROI				Female
4/21/2019 22:14:25	582	Rat Winstar	15	Anesthesia free-breathing	Medetomidine	9.4T		SE-EPI	BOLD	Lab made	Stimulus-evoked fMRI, Resting-state fMRI	Lab-made	GLM, ROI, Seed-based				Male
4/21/2019 22:17:09	583	Rat Winstar	12	Anesthesia free-breathing	Î±-chloralose	7T		GE-EPI	BOLD	Medx	Stimulus-evoked fMRI		GLM, ROI				Male
4/21/2019 22:28:34	584	Rat Winstar	5	Anesthesia free-breathing	Halothane	7T		SE-EPI, T1SE	BOLD, MEMRI	STIMULATE	Stimulus-evoked fMRI		GLM, ROI				Male
4/21/2019 22:33:09	585	Rat Winstar	20	Anesthesia ventilated	Isoflurane	4.7T		GE-EPI	BOLD	FSL, ANTS	Resting-state fMRI	Lab-made	ICA, dual-regression				Male
4/21/2019 22:35:54	586	Rhesus	2	Awake		3T or less		GE-EPI	CBV		Stimulus-evoked fMRI		GLM				Male
4/21/2019 22:38:42	587	Rhesus	6	Anesthesia free-breathing	Isoflurane	7T		GE-EPI	BOLD	FSL, AFNI	Resting-state fMRI	MACAQUE F99	Network analysis, Graph theory, dFC				Both
4/21/2019 22:39:55	588	Rhesus	2	Awake							Stimulus-evoked fMRI				NA		Both
4/21/2019 22:42:29	589	Rhesus	3	Awake		4.7T		GE-EPI	BOLD	SPM	Stimulus-evoked fMRI	Lab-made	GLM, ROI				Both
4/21/2019 22:43:52	590										Stimulus-evoked fMRI				NA
4/21/2019 22:48:10	591	Mouse other	16	Anesthesia free-breathing	Isoflurane	9.4T		GE-EPI	BOLD	AFNI	Resting-state fMRI	Mouse (Aggarwal et al., 2009)	Network analysis
4/21/2019 22:52:38	592	Rat other	13	Anesthesia ventilated	Isoflurane	4.7T		RARE	CBV		Stimulus-evoked fMRI		ROI				Male
4/21/2019 22:59:07	593	Rat Sprague	10	Anesthesia free-breathing	Isoflurane	9.4T		GE-EPI	BOLD	Lab made, STIMULATE	Resting-state fMRI		Seed-based, Network analysis, dFC				Male
4/21/2019 23:02:42	594	Rat Sprague	12	Anesthesia free-breathing	Isoflurane	4.7T		GE-EPI	BOLD, CBF	Lab made, STIMULATE	Stimulus-evoked fMRI		GLM, ROI				Male
4/21/2019 23:07:09	595	Rat Sprague	28	Anesthesia ventilated	Halothane	7T		GE-EPI	BOLD, CBV, CBF		Stimulus-evoked fMRI		GLM, ROI				Male
4/21/2019 23:10:15	596	Pig	5	Anesthesia free-breathing	Isoflurane	3T or less		GE-EPI	BOLD		Deep-brain stimulation fMRI		GLM, ROI				Male
4/21/2019 23:14:10	597	Rat Sprague	9	Anesthesia free-breathing	Isoflurane	4.7T		GE-EPI	BOLD, CBF		Stimulus-evoked fMRI		GLM, ROI				Male
4/21/2019 23:18:54	598	Rat Sprague		Anesthesia free-breathing	Medetomidine	9.4T		SE-EPI	BOLD	Lab made	Resting-state fMRI		Network analysis				Male
4/21/2019 23:21:35	599	Squirrel Monkey	11	Anesthesia ventilated	Isoflurane	9.4T		GE-EPI	BOLD	Lab made	Stimulus-evoked fMRI		GLM, ROI
4/22/2019 9:27:49	600	Rat Sprague	17	Anesthesia ventilated	Î±-chloralose	11.7T		GE-EPI	BOLD, CBV, CBF	Lab made	Stimulus-evoked fMRI		GLM, ROI				Male
4/22/2019 9:30:07	601	pig	5	Anesthesia free-breathing	Isoflurane	3T or less		GE-EPI	BOLD	Brain Voyager QX	Deep-brain stimulation fMRI	PIG Saikali 2010	GLM, ROI				Male
4/22/2019 9:33:23	602	Rat Long evans	38	Anesthesia ventilated	Propofol	9.4T		GE-EPI	BOLD	AFNI	Resting-state fMRI	RAT Lu et al., 2007	GLM, ROI				Male
4/22/2019 9:34:54	603	Rat Winstar	15	Anesthesia ventilated	Urethane						Stimulus-evoked fMRI				NA		Male
4/22/2019 9:37:32	604	Rat Sprague	40	Anesthesia free-breathing	Halothane	3T or less		RARE	BOLD	SPM, MedX,	Pharma fMRI	Lab-made	GLM, ROI				Male
4/22/2019 9:40:38	605	Cat	10	Anesthesia ventilated	Isoflurane, Ketamine, Combinations	7T		FLASH	BOLD	SPM, Lab made	Stimulus-evoked fMRI	Lab-made	GLM, ROI
4/22/2019 9:44:41	606	Rat Winstar	12	Anesthesia free-breathing	Medetomidine	4.7T		GE-EPI	BOLD	BrainVoyager	Deep-brain stimulation fMRI	Lab-made	GLM, ROI				Male
4/22/2019 9:47:57	607	Rat Sprague	18	Anesthesia ventilated	halothane	7T		FLASH	BOLD	FSL	Stimulus-evoked fMRI		GLM, ROI				Male
4/22/2019 9:52:12	608	Rat Sprague	11	Anesthesia free-breathing	Medetomidine	9.4T		GE-EPI	BOLD	Lab made	Resting-state fMRI		Seed-based, dFC				Male
4/22/2019 9:56:14	609	Rat Winstar	17	Anesthesia ventilated	Isoflurane	4.7T		GE-EPI	BOLD	FSL	Resting-state fMRI	Lab-made	Seed-based				Male
4/22/2019 9:58:40	610	Rat Sprague	33	Anesthesia ventilated	Urethane	3T or less		GE-EPI	BOLD		Pharma fMRI		GLM, ROI				Male
4/22/2019 10:01:34	611	Rat Long evans	50	Anesthesia free-breathing	Isoflurane	7T		GE-EPI	BOLD	SPM	Resting-state fMRI	Lab-made	Seed-based, Network analysis, ALFF
4/22/2019 10:06:01	612	Rat Sprague	26	Anesthesia free-breathing	Isoflurane	9.4T		GE-EPI	BOLD	FSL	Stimulus-evoked fMRI	Lab-made	GLM				Male
4/22/2019 10:09:29	613	Rat Sprague	10	Anesthesia free-breathing	Isoflurane, Medetomidine	9.4T		GE-EPI	BOLD		Resting-state fMRI		dFC				Male
4/22/2019 10:13:23	614	Rat Winstar		Anesthesia ventilated	Isoflurane	9.4T		GE-EPI	BOLD	FSL	Dreadd fMRI	Lab-made	dual-regression				Male
4/22/2019 10:16:26	615	Rat other	32	Anesthesia ventilated	Medetomidine	9.4T		GE-EPI	BOLD	AFNI	Resting-state fMRI	Lab-made	Seed-based				Male
4/22/2019 10:18:56	616	Rat Sprague	5	Anesthesia ventilated	Halothane	9.4T		GE-EPI	BOLD, CBV		Pharma fMRI	Lab-made	GLM, ROI				Male
4/22/2019 10:23:10	617	Rhesus	2	Anesthesia free-breathing	Isoflurane	3T or less		GE-EPI	CBV	AFNI	Pharma fMRI	Saleemâˆ’Logothetis	GLM, ROI				Male
4/22/2019 10:24:31	618										Resting-state fMRI				NA
4/22/2019 10:24:59	619														NA
4/22/2019 10:27:22	620	Rat Sprague	18	Awake restrained		4.7T		FLASH	BOLD	SPM, Lab made	Stimulus-evoked fMRI	Lab-made	GLM				Male
4/22/2019 10:50:03	621	Dog	5	Awake		3T or less		GE-EPI	BOLD	SPM	Stimulus-evoked fMRI	Lab-made	GLM, ROI				Male
4/22/2019 10:52:35	622	Rhesus	3	Awake		3T or less		GE-EPI	BOLD	SPM	Stimulus-evoked fMRI	Lab-made	GLM, ROI				Male
4/22/2019 10:55:21	623	Rhesus	15	Anesthesia ventilated	Isoflurane, Fentanyl, Combinations	4.7T		GE-EPI	BOLD	Lab made, MedX	Stimulus-evoked fMRI		GLM, ROI
4/22/2019 10:59:07	624	Rhesus	107	Anesthesia free-breathing	Ketamine	3T or less		GE-EPI	BOLD	FSL, AFNI	Resting-state fMRI	Lab-made	Seed-based				Both
4/22/2019 11:04:08	625	Rhesus	2	Anesthesia free-breathing	Medetomidine, Propofol, Combinations	4.7T		GE-EPI	BOLD	SPM, Lab made	Deep-brain stimulation fMRI	Lab-made	GLM				Male
4/22/2019 11:05:18	626	Rhesus	3								Stimulus-evoked fMRI				NA		Female
4/22/2019 11:07:16	627	Rhesus	6	Anesthesia free-breathing	Ketamine	3T or less		GE-EPI	BOLD	SPM	Resting-state fMRI	MACAQUE INIA19	ReHo				Male
4/22/2019 11:12:02	628	Rat Sprague	16			7T		GE-EPI	BOLD	SPM	Stimulus-evoked fMRI		GLM				Male
4/22/2019 11:15:31	629	Rat Sprague	24	Awake, Anesthesia free-breathing	Isoflurane, Î±-chloralose	4.7T		FLASH	BOLD	SPM, Lab made	Stimulus-evoked fMRI		GLM, ROI				Male
4/22/2019 11:18:03	630	Rat Sprague	12	Anesthesia ventilated	Isoflurane						Stimulus-evoked fMRI				NA		Male
4/22/2019 11:20:12	631	Rat Winstar		Anesthesia free-breathing	Isoflurane	9.4T		GE-EPI	BOLD		Pharma fMRI		ROI				Male
4/22/2019 11:23:46	632	Rat Winstar		Anesthesia free-breathing	Urethane	7T		GE-EPI	BOLD	FSL, Lab made	Resting-state fMRI	Lab-made	Network analysis
4/22/2019 11:24:33	633														NA
4/22/2019 11:26:49	634	Mouse Black6, Mouse other	20	Anesthesia ventilated	Isoflurane	7T		RARE	CBV	FSL	Pharma fMRI	Lab-made	GLM, ROI				Male
4/22/2019 11:29:57	635	Rat Winstar	14	Anesthesia free-breathing	Isoflurane	4.7T		GE-EPI	BOLD	MIVA	Resting-state fMRI	RAT MIVA template	Seed-based, Network analysis				Male
4/22/2019 11:32:10	636	Cat	17	Anesthesia ventilated	Isoflurane	4.7T		GE-EPI	BOLD, CBV	STIMULATE	Stimulus-evoked fMRI		GLM, ROI
4/22/2019 11:34:57	637	Rat Sprague	11	Anesthesia ventilated	Î±-chloralose	11.7T		SE-EPI	BOLD	Lab made, STIMULATE	Stimulus-evoked fMRI		GLM, ROI				Male
4/22/2019 11:38:53	638	Rhesus	2	Awake		3T or less		GE-EPI	CBV	SPM	Stimulus-evoked fMRI	MACAQUE Van Essen 200	GLM				Both
4/22/2019 11:43:16	639	Cat	20	Anesthesia ventilated	Isoflurane, Ketamine, Combinations	7T		GE-EPI	BOLD	SPM	Resting-state fMRI	Lab-made	ICA, Network analysis				Both
4/22/2019 11:45:48	640	Dog	15	Awake		3T or less		GE-EPI	BOLD	AFNI	Stimulus-evoked fMRI		ROI				Both
4/22/2019 20:17:07	641	Rat Winstar	6			7T		GE-EPI	BOLD	SPM, FSL, AFNI, Lab made	Deep-brain stimulation fMRI	Lab-made	GLM, ROI				Male
4/22/2019 20:19:43	2010	Rat Winstar	32	Awake		4.7T		FLASH	BOLD	SPM	Stimulus-evoked fMRI	Lab-made	GLM, ROI				Male
4/22/2019 20:23:05	643	Rat Sprague	9	Anesthesia ventilated	Î±-chloralose	7T		SE-EPI	BOLD	Lab made	Stimulus-evoked fMRI		ROI				Male
4/22/2019 20:27:11	644	Rat Sprague	34	Anesthesia free-breathing	Isoflurane	3T or less		FSE	BOLD	SPM, Lab made, MEDx	Pharma fMRI	Lab-made	GLM, ROI				Male
4/22/2019 20:30:51	645	Rat Long evans	36	Awake		7T		GE-EPI	BOLD	SPM	Pharma fMRI	Lab-made	GLM, ROI			contact author	Male
4/22/2019 20:32:41	646														NA
4/22/2019 20:36:06	647	Rat Sprague	27	Awake		7T		HASTE	BOLD	SPM, MIVA	Pharma fMRI	RAT EKAM Solution	GLM, ROI				Female
4/22/2019 20:36:39	648														NA
4/22/2019 20:40:31	649	Rat Sprague	36	Anesthesia ventilated	Isoflurane	7T		GE-EPI, bSSFP	BOLD	SPM	Stimulus-evoked fMRI	Lab-made	GLM				Male
4/22/2019 20:44:45	650	Rat Winstar	6	Anesthesia free-breathing	Medetomidine	4.7T		GE-EPI	BOLD	BrainVoyager	Deep-brain stimulation fMRI	Lab-made	GLM, ROI				Male
4/22/2019 20:47:33	651	Pig	10	Anesthesia ventilated	Isoflurane	3T or less		GE-EPI	BOLD	Brain Voyager	Deep-brain stimulation fMRI	PIG Saikali	GLM, ROI				Male
4/22/2019 20:50:22	652	Rat Sprague	7	Anesthesia free-breathing	Î±-chloralose	4.7T		FLASH	CBV	Stimulate	Stimulus-evoked fMRI		GLM, ROI				Female
4/22/2019 20:54:59	653	Zebra Finch	7	Anesthesia free-breathing	Isoflurane, Medetomidine, Urethane	7T		FLASH	BOLD	Lab made	Stimulus-evoked fMRI		GLM				Male
4/22/2019 20:58:39	654	Rat Sprague	32	Anesthesia free-breathing	Isoflurane	9.4T		GE-EPI	BOLD	FSL	Stimulus-evoked fMRI	Lab-made	GLM, ROI				Male
4/22/2019 21:02:56	655	Mouse Black6, Mouse other		Anesthesia free-breathing	Isoflurane	9.4T		FLASH	BOLD	Imagej	Pharma fMRI		ROI
4/28/2019 12:12:40	656	Marmoset	6	Anesthesia free-breathing	Isoflurane	7T		GE-EPI	BOLD	AFNI, Lab made	Stimulus-evoked fMRI		GLM, ROI				Male
4/28/2019 12:14:35	657	Salmon	6	Anesthesia free-breathing	eugenol	7T		GE-EPI	BOLD	Lab made	Stimulus-evoked fMRI		GLM, ROI				Both
4/28/2019 12:18:26	658	Other Monkey	4	Anesthesia free-breathing	Propofol	3T or less		GE-EPI	BOLD	SPM, FSL	Stimulus-evoked fMRI	MACAQUE Black 2004	GLM, ROI				Male
4/28/2019 12:20:58	659	Rat other		Anesthesia free-breathing	Isoflurane	9.4T		GE-EPI	BOLD	Lab made	Resting-state fMRI	Lab-made	dFC
4/28/2019 12:23:20	660														NA
4/28/2019 12:26:05	661	Rat Sprague	36	Awake		7T		GE-EPI	BOLD	SPM, MIVA	Pharma fMRI	Lab-made	GLM
4/28/2019 12:27:46	662	Dog	7	Awake		3T or less		GE-EPI	BOLD	FSL	Stimulus-evoked fMRI		GLM				Both
4/28/2019 12:29:24	663	Rabbit	12	Awake		7T		GE-EPI	BOLD	FSL, AFNI	Resting-state fMRI		Seed-based, dual-regression				Female
4/28/2019 12:32:19	664	Rhesus	3	Awake		3T or less		GE-EPI	BOLD	SPM	Stimulus-evoked fMRI	MACAQUE 112RM-SL McLaren 2009	GLM, ROI				Both
4/28/2019 12:34:31	665	Rhesus	6	Awake		3T or less		GE-EPI	CBV	SPM	Stimulus-evoked fMRI	Lab-made	GLM, ROI				Male
4/28/2019 12:37:51	666	Rat Sprague	11	Anesthesia ventilated	Halothane	7T		FLASH	BOLD	FSL, AFNI	Pharma fMRI		GLM, ROI				Male
4/28/2019 12:40:36	667	Rat Winstar	13	Anesthesia ventilated	Fentanyl, Combinations, haloperidol	9.4T		SE-EPI	BOLD	Lab made, BioImage	Pharma fMRI	Lab-made	GLM				Female
4/28/2019 12:43:25	668	Cat	3	Anesthesia ventilated	Isoflurane	9.4T		HSE	BOLD, diffusion	Lab made, Stimulate	Stimulus-evoked fMRI		GLM, ROI
4/28/2019 12:47:52	669	Cat	8	Anesthesia ventilated	Isoflurane	4.7T		GE-EPI	BOLD, CBV	Stimulate	Stimulus-evoked fMRI		GLM, ROI
4/28/2019 12:51:13	670	Rat Winstar	9	Anesthesia free-breathing	Isoflurane	3T or less		RARE	BOLD	SPM, Medx	Pharma fMRI	Lab-made	GLM, ROI
4/28/2019 12:54:19	672	Rhesus	7	Anesthesia free-breathing	Propofol	3T or less		GE-EPI	BOLD	SPM	Resting-state fMRI	MACAQUE INIA19	ReHo, ALFF				Female
4/28/2019 12:55:58	673	Cat	6	Anesthesia ventilated	Isoflurane	9.4T		GE-EPI	BOLD	STIMULATE	Stimulus-evoked fMRI		GLM, ROI
4/28/2019 13:02:10	674	Rat other	10		Ketamine, Combinations, Xylazine	3T or less		GE-EPI	BOLD		Stimulus-evoked fMRI		GLM, ROI				Male
4/28/2019 13:05:07	675	Mouse other	10	Anesthesia free-breathing	Isoflurane	4.7T		GE-EPI	BOLD	Brain Voyager	Stimulus-evoked fMRI		GLM
4/28/2019 13:07:47	676	Rat Sprague	10	Anesthesia free-breathing	Isoflurane	7T		GE-EPI	BOLD	SPM	Opto fMRI		GLM, ROI				Male
4/28/2019 13:11:03	677	Mouse Black6, Mouse other	36	Anesthesia free-breathing	Isoflurane	7T		ASL	CBF		Resting-state fMRI		ROI
4/28/2019 13:13:26	678	Rat Sprague	25	Anesthesia free-breathing	Urethane	4.7T		GE-EPI	BOLD	Lab made	Stimulus-evoked fMRI		GLM, ROI				Male
4/28/2019 13:21:30	679	Other Monkey	6	Anesthesia ventilated	Isoflurane	9.4T		GE-EPI	BOLD	Lab made	Stimulus-evoked fMRI	Lab-made	GLM, ROI
4/28/2019 13:24:12	680	Rat Sprague	12	Anesthesia free-breathing	Isoflurane	7T		SE-EPI	BOLD	SPM	Stimulus-evoked fMRI	Lab-made	GLM, ROI				Female
4/28/2019 13:27:57	681	Rat Winstar	28	Anesthesia ventilated	Urethane	7T		SE-EPI	BOLD		Resting-state fMRI		ROI, Network analysis				Male
4/28/2019 13:30:24	682	Rat Long evans	14	Anesthesia ventilated	Isoflurane	11.7T		GE-EPI	BOLD	SPM	Stimulus-evoked fMRI		ROI
4/28/2019 13:32:15	683	Rabbit	9	Awake		7T		GE-EPI	BOLD	AFNI	Stimulus-evoked fMRI		GLM, ROI				Female
4/28/2019 13:34:48	684	Rat Sprague	58	Awake		4.7T		FSE	BOLD	Stimulate	Stimulus-evoked fMRI	RAT Ferris 2005	GLM, ROI				Male
4/28/2019 13:37:05	685	Rat Sprague	68	Anesthesia ventilated	Isoflurane	7T		GE-EPI	BOLD	SPM	Resting-state fMRI	Lab-made	Seed-based, ICA				Male
4/28/2019 13:39:21	686	Rhesus	3	Awake		3T or less		GE-EPI	CBV	AFNI	Resting-state fMRI	MACAQUE INIA19	ICA, dual-regression, Network analysis	Non-parametric			Female
4/28/2019 13:42:13	687	Rhesus	2	Awake		3T or less		GE-EPI	CBV	SPM	Stimulus-evoked fMRI		GLM				Both
4/28/2019 13:44:49	688	Rat Sprague	7	Anesthesia free-breathing	Isoflurane, Medetomidine	9.4T		GE-EPI	BOLD	Lab made, STIMULATE	Resting-state fMRI		Seed-based				Male
4/28/2019 13:45:10	689														NA
4/28/2019 13:47:32	690	Other Monkey	2	Awake		3T or less		GE-EPI	BOLD	SPM	Stimulus-evoked fMRI		GLM, ROI				Male
4/28/2019 13:48:24	691														NA
4/28/2019 13:51:07	692	Ferret	6	Anesthesia ventilated	Ketamine, Combinations, Xylazine	9.4T		GE-EPI	BOLD	FSL, AFNI	Resting-state fMRI	Lab-made	ICA, Network analysis, Graph theory				Female
4/28/2019 13:56:11	693	Rat Sprague	20	Anesthesia ventilated	Isoflurane	9.4T		GE-EPI	BOLD	SPM	Stimulus-evoked fMRI, Opto fMRI		GLM, ROI				Male
4/28/2019 13:59:27	694	Rat Winstar		Awake		4.7T		FLASH	BOLD	SPM, Lab made	Stimulus-evoked fMRI		GLM, ROI				Male
4/28/2019 14:01:28	695	Rat Winstar		Anesthesia free-breathing	chloral hydrate	4.7T		GE	BOLD	SPM	Stimulus-evoked fMRI	Lab-made	GLM, ROI				Male
4/28/2019 14:04:05	696	Rat Sprague	13	Anesthesia free-breathing	Urethane	7T		GE-EPI	BOLD	SPM, FSL, AFNI	Deep-brain stimulation fMRI		GLM, ROI				Male
4/28/2019 14:06:20	697	Rhesus	3	Awake		3T or less		GE-EPI	CBV	AFNI	Stimulus-evoked fMRI		GLM				Male
4/28/2019 14:08:22	698	Rat Sprague	24	Anesthesia ventilated	Halothane	11.7T		SE-EPI	BOLD, CBV	Lab made, STIMULATE	Stimulus-evoked fMRI		GLM, ROI				Male
4/28/2019 14:10:59	699	Rat Sprague	10	Anesthesia ventilated	Î±-chloralose	7T		SE-EPI	BOLD	Stimulate	Stimulus-evoked fMRI		GLM, ROI				Male
4/28/2019 16:29:24	700	Rhesus				4.7T, 7T					Stimulus-evoked fMRI				NA
4/28/2019 16:31:38	701	Rat other	13	Anesthesia free-breathing	Medetomidine	7T		GE-EPI	BOLD	SPM, AFNI, Lab made	Resting-state fMRI	Lab-made	Seed-based				Male
4/28/2019 16:34:31	702	Rat Sprague	16	Anesthesia free-breathing	Isoflurane	7T		GE-EPI	BOLD	FSL	Stimulus-evoked fMRI	Lab-made	GLM, ROI
4/28/2019 16:36:32	703	Rat Sprague	8	Anesthesia free-breathing	Isoflurane	7T		SE-EPI, cASL	BOLD, CBF	Lab made, STIMULATE	Stimulus-evoked fMRI		GLM, ROI				Male
4/28/2019 16:39:32	704	Marmoset	16	Awake		4.7T		GE-EPI	BOLD		Stimulus-evoked fMRI		ROI
4/28/2019 16:41:22	705	Rat Winstar	4	Anesthesia free-breathing	Î±-chloralose	7T		GE-EPI	BOLD	SPM	Stimulus-evoked fMRI		GLM				Male
4/28/2019 16:44:27	706	Rat Sprague	14	Anesthesia ventilated	Î±-chloralose	9.4T		GE-EPI	BOLD	Lab made, STIMULATE	Stimulus-evoked fMRI		GLM, ROI				Male
4/28/2019 16:48:01	707	Rat Sprague	9	Anesthesia ventilated	Isoflurane	7T		GE-EPI, bSSFP	BOLD	FSL, Lab made	Resting-state fMRI	Lab-made	ICA				Male
4/28/2019 16:50:36	708	Rat Sprague	4	Anesthesia ventilated	Isoflurane	4.7T		DTI	diffusion		Stimulus-evoked fMRI				NA		Male
4/28/2019 16:53:53	709	Rat Sprague	6	Anesthesia ventilated	Isoflurane	9.4T		bSSFP, GE	BOLD	Lab made	Stimulus-evoked fMRI		GLM, ROI				Male
4/28/2019 16:59:47	710	Mouse other	8	Anesthesia free-breathing	Isoflurane			FAIR	CBF		Dreadd fMRI		ROI
4/28/2019 17:03:11	711	Mouse other	40	Anesthesia free-breathing	Isoflurane	11.7T		GE-EPI	BOLD	FSL	Resting-state fMRI	Lab-made	ICA, dual-regression				Male
4/28/2019 17:06:20	712	Mouse Black6	28	Anesthesia ventilated	Isoflurane, Medetomidine, Urethane, Propofol	9.4T		GE-EPI	BOLD, CBV	SPM	Stimulus-evoked fMRI	Lab-made	GLM, ROI				Female
4/28/2019 17:08:37	713	Rat Sprague	12	Anesthesia ventilated	Î±-chloralose	9.4T		GE-EPI	BOLD, CBV		Stimulus-evoked fMRI		GLM, ROI				Male
4/28/2019 17:13:09	714	Rat Sprague	12	Anesthesia free-breathing	Isoflurane, Medetomidine, Combinations	7T		GE-EPI	CBV	Stimulate	Stimulus-evoked fMRI	Lab-made	GLM, ROI
4/28/2019 17:16:16	715	Squirrel Monkey	6	Anesthesia ventilated	Isoflurane	9.4T		GE-EPI	BOLD	FSL, AFNI	Stimulus-evoked fMRI, Resting-state fMRI		GLM, ROI, Seed-based				Male
4/28/2019 17:18:35	716	Rhesus	6	Anesthesia ventilated	Fentanyl	4.7T		GE-EPI, SE-EPI	BOLD, CBV	Lab made	Stimulus-evoked fMRI		GLM, ROI
4/28/2019 17:21:09	717	Mouse other	32	Anesthesia free-breathing	Î±-chloralose, Urethane, Combinations	4.7T		GE	BOLD		Pharma fMRI		ROI				Male
4/28/2019 17:23:08	718	Mouse Black6	63	Anesthesia ventilated	Isoflurane, Medetomidine, Urethane, Propofol, Combinations	9.4T		GE-EPI	BOLD	SPM	Resting-state fMRI	Lab-made	Seed-based, ICA			public repository	Female
4/28/2019 17:26:08	719	Zebra Finch	16	Anesthesia free-breathing	Diazepam	3T or less		GE-EPI	BOLD	AFNI, Lab made	Stimulus-evoked fMRI	Lab-made	GLM, ROI				Male
4/28/2019 17:27:10	720														NA
4/28/2019 17:30:19	721	Rat Sprague	8	Anesthesia ventilated	Ketamine, Combinations, Xylazine	9.4T		GE-EPI	BOLD	Lab made	Deep-brain stimulation fMRI	Lab-made	GLM, ROI				Female
4/28/2019 17:30:46	722														NA
4/28/2019 17:34:06	723	Rat Winstar	5	Anesthesia ventilated	Î±-chloralose	7T		GE-EPI, SE-EPI, FLASH	BOLD, CBV	Stimulate	Stimulus-evoked fMRI		GLM, ROI				Male
4/28/2019 17:37:02	724	Rhesus	5	Awake		3T or less		GE-EPI	CBV	Freesurfer	Stimulus-evoked fMRI		GLM				Male
4/28/2019 17:41:58	725	Mouse Black6	34	Anesthesia free-breathing	Ketamine, Combinations, Xylazine	9.4T		GE-EPI	BOLD	AFNI	Stimulus-evoked fMRI, Resting-state fMRI		GLM, ROI				Male
4/28/2019 17:47:10	726	Mouse other	10	Anesthesia free-breathing	Medetomidine, Ketamine, Combinations	7T		GE-EPI	CBV	AFNI	Pharma fMRI		GLM				Female
4/28/2019 17:49:31	727	Rat other	9	Anesthesia free-breathing	Medetomidine	9.4T		GE-EPI	BOLD	Lab made	Stimulus-evoked fMRI, Opto fMRI		GLM, ROI				Female
4/28/2019 17:52:47	728	Rat Sprague	5	Anesthesia free-breathing	Medetomidine, Ketamine, Combinations	4.7T		SE-EPI	BOLD		Pharma fMRI		GLM				Male
4/28/2019 17:54:58	729	Rhesus	3	Awake		4.7T		GE-EPI	CBV		Stimulus-evoked fMRI		GLM, ROI			contact author	Female
4/28/2019 17:57:20	730	Rat Winstar	12	Anesthesia ventilated	Î±-chloralose	7T		GE-EPI	BOLD	SPM	Stimulus-evoked fMRI	Lab-made	GLM, ROI				Female
2019-04-05 14:52:54	731	Rat Winstar	18	Anesthesia free-breathing	Isoflurane	11.7T		GE-EPI	BOLD	FSL	Stimulus-evoked fMRI	Lab-made	GLM, ROI				Male
2019-04-05 14:56:38	732	Rhesus	8	Anesthesia ventilated	Isoflurane	3T or less		GE-EPI	BOLD	FSL, Lab made	Resting-state fMRI	Lab-made	Seed-based
2019-04-05 14:59:36	733	Zebra Finch	5	Anesthesia free-breathing	Medetomidine	7T		FLASH	BOLD	Lab made, MEDx	Stimulus-evoked fMRI		GLM				Male
2019-04-05 15:02:06	734	Rat Sprague	15	Anesthesia ventilated	Î±-chloralose	11.7T		GE-EPI, SE-EPI	BOLD, CBV	STIMULATE	Stimulus-evoked fMRI	Lab-made	GLM, ROI				Male
2019-04-05 15:07:34	735	Rat Winstar		Anesthesia free-breathing	Isoflurane	4.7T		GE-EPI	BOLD	BrainVoyager QX	Deep-brain stimulation fMRI	Lab-made	GLM, ROI				Male
2019-04-05 15:11:55	736	Mouse Black6, Mouse other	28	Anesthesia ventilated	Isoflurane, Medetomidine, Combinations	9.4T		GE-EPI	BOLD, CBV	AFNI	Stimulus-evoked fMRI, Resting-state fMRI	Lab-made	GLM, ROI, Seed-based, Network analysis				Female
2019-04-05 15:16:36	737	Rat Sprague	20	Anesthesia ventilated	Î±-chloralose	9.4T		GE-EPI	BOLD, CBF	SPM	Stimulus-evoked fMRI	RAT Schwarz	GLM, ROI				Male
2019-04-05 15:21:18	738	Rat Sprague	15	Anesthesia free-breathing	Isoflurane, Medetomidine, Combinations	7T		GE-EPI	BOLD, CBV	Stimulate	Stimulus-evoked fMRI		GLM, ROI
2019-04-05 15:24:02	739	Rat other	8	Anesthesia free-breathing	Isoflurane	7T		GE-EPI	BOLD	SPM	Stimulus-evoked fMRI		GLM, ROI				Male
2019-04-05 15:26:34	740	Rat Sprague	9	Anesthesia ventilated	Î±-chloralose, Urethane, Combinations	3T or less		GE-EPI	BOLD	MEDx	Stimulus-evoked fMRI		GLM, ROI				Male
2019-04-05 15:31:24	741	Mouse other		Anesthesia free-breathing	Urethane	7T		FLASH	BOLD		Stimulus-evoked fMRI		GLM				Male
2019-04-05 15:33:21	742	Rat Sprague		Anesthesia free-breathing	Urethane	7T		FLASH	BOLD		Stimulus-evoked fMRI		GLM				Male
2019-04-05 15:35:52	743	Rat Winstar	7	Anesthesia ventilated	Î±-chloralose	4.7T		FLASH	BOLD, CBV	Lab made, Stimulate	Stimulus-evoked fMRI		GLM, ROI				Male
2019-04-05 15:38:04	744	Mouse Black6	41	Anesthesia ventilated	Halothane	7T		GE-EPI	BOLD	FSL, AFNI	Resting-state fMRI	Lab-made	Graph theory				Male
2019-04-05 15:39:03	745														NA
2019-04-05 15:42:15	746	teleost fish	6	Anesthesia free-breathing	MS-222	7T		GE	BOLD, CBV	Lab made	Stimulus-evoked fMRI		GLM, ROI
2019-04-05 15:44:53	747	Rhesus	3	Awake		7T		GE-EPI, SE-EPI	BOLD	SPM, FSL, Lab made	Stimulus-evoked fMRI		GLM, ROI
2019-04-05 15:49:38	748	Rhesus	89	Anesthesia free-breathing	Medetomidine, Ketamine, Combinations	3T or less		GE-EPI	BOLD	FSL, AFNI	Resting-state fMRI	Lab-made	Seed-based				Both
2019-04-05 15:51:50	749	Rat Sprague	12	Anesthesia free-breathing	Medetomidine	11.7T		GE-EPI	BOLD	FSL	Stimulus-evoked fMRI	Lab-made	GLM, ROI
2019-04-05 18:35:36	750	Rhesus	4	Anesthesia ventilated	Fentanyl	4.7T		GE-EPI	BOLD, CBV	Lab made	Stimulus-evoked fMRI		GLM, ROI
2019-04-05 18:39:06	751	Rat Sprague	85	Awake restrained		7T		HASTE	BOLD	SPM, MIVA	Pharma fMRI	Lab-made	GLM, ROI				Both
2019-04-05 18:40:38	752	Mouse Black6, Mouse other	20	Anesthesia ventilated	Halothane	7T		GE-EPI	BOLD	FSL	Resting-state fMRI	Lab-made	Seed-based, Network analysis				Male
2019-04-05 18:43:32	753	Rat Sprague	22	Anesthesia free-breathing	Medetomidine	9.4T		GE-EPI	BOLD	SPM, FSL, AFNI	Resting-state fMRI	RAT Schwarz	Seed-based				Male
2019-04-05 18:45:20	754	Rat other	7	Awake							Stimulus-evoked fMRI				NA		Female
2019-04-05 18:48:12	755	Rat Sprague	27	Anesthesia free-breathing	Halothane	3T or less		GE	BOLD, CBV		Pharma fMRI		GLM, ROI
2019-04-05 18:52:28	756	Rat Sprague	7	Anesthesia free-breathing	Isoflurane	11.7T		ME-EPI	BOLD	AFNI	Resting-state fMRI		Seed-based, ICA				Male
2019-04-05 18:55:29	757	Squirrel Monkey	4	Anesthesia ventilated	Isoflurane	9.4T		GE-EPI	BOLD	SPM, Lab made	Resting-state fMRI		ALFF				Male
2019-04-05 18:58:15	758	Rat Sprague	29	Anesthesia free-breathing	Isoflurane	7T		GE-EPI	BOLD	SPM	Pharma fMRI	RAT Lancelot 2014	GLM, ROI				Male
2019-04-05 19:05:20	759										Opto fMRI				NA
2019-04-05 19:07:32	760	Rhesus	2	Awake		4.7T		GE-EPI	BOLD	AFNI	Stimulus-evoked fMRI	Lab-made	GLM, ROI				Both
2019-04-05 19:11:28	761	Pig	12	Awake restrained		3T or less		GE-EPI	BOLD	AFNI	Stimulus-evoked fMRI		GLM
2019-04-05 19:13:12	762	Rat Sprague	5	Anesthesia ventilated	Urethane	3T or less		GE-EPI	BOLD, CBV	AFNI	Stimulus-evoked fMRI		GLM				Male
2019-04-05 19:15:33	763	Rhesus	4	Anesthesia free-breathing	Medetomidine, Ketamine, Combinations	3T or less		GE-EPI	BOLD	Lab made, Stimulate	Stimulus-evoked fMRI	Lab-made	GLM, ROI				Female
2019-04-05 19:17:39	764	Mouse Black6	14	Anesthesia ventilated	Isoflurane, Medetomidine, Combinations			GE-EPI	BOLD	FSL, ANTS	Resting-state fMRI	MOUSE Australian mouse brain mapping consortium (AMBMC)	Seed-based, ICA, dual-regression, Network analysis	Non-parametric		public repository	Female
2019-04-05 19:21:24	765	Rhesus	10	Anesthesia free-breathing	Isoflurane, Medetomidine, Combinations	3T or less		GE-EPI	BOLD, CBV	Lab made, Stimulate	Stimulus-evoked fMRI		GLM, ROI				Female
2019-04-05 19:23:15	766	Rhesus	2	Awake		3T or less		GE-EPI	CBV	Freesurfer	Stimulus-evoked fMRI		GLM
2019-04-05 19:27:34	767	Rhesus	2	Awake		4.7T		GE-EPI	CBV	AFNI, Lab made	Stimulus-evoked fMRI		GLM			contact author	Male
2019-05-05 12:18:09	768	Rat Sprague		Anesthesia ventilated	Î±-chloralose						Stimulus-evoked fMRI				NA		Male
2019-05-05 12:20:04	769	Mouse Black6		Anesthesia ventilated	Isoflurane	4.7T		RARE	CBV	Biomap	Pharma fMRI		ROI				Male
2019-05-05 12:22:14	770	Rhesus	6	Awake restrained		3T or less		GE-EPI	CBV	AFNI	Stimulus-evoked fMRI	MACAQUE Saleem and Logothetis	GLM				Male
2019-05-05 12:24:07	771	Rat Sprague	5	Anesthesia ventilated	Î±-chloralose	4.7T		FLASH	BOLD	Lab made	Stimulus-evoked fMRI		GLM				Male
2019-05-05 12:27:04	772	Squirrel Monkey	7	Anesthesia ventilated	Isoflurane	9.4T		FLASH	BOLD	AFNI	Stimulus-evoked fMRI		GLM, ROI				Male
2019-05-05 12:30:04	773	Rat Winstar	13	Anesthesia free-breathing	Isoflurane, Medetomidine, Combinations	7T		GE-EPI	CBV	Lab made, Stimulate	Stimulus-evoked fMRI		GLM, ROI
2019-05-05 12:32:02	774	Cat	9	Anesthesia ventilated	Isoflurane	4.7T, 9.4T		GE-EPI	BOLD, CBV		Stimulus-evoked fMRI		GLM, ROI				Female
2019-05-05 12:34:19	775	Rhesus	2	Anesthesia ventilated	Isoflurane	3T or less		GE-EPI	BOLD	Stimulate	Stimulus-evoked fMRI		GLM
2019-05-05 12:39:48	776	Mouse Black6		Anesthesia ventilated	Isoflurane	9.4T		GE-EPI	BOLD	FSL, ANTS	Stimulus-evoked fMRI	MOUSE Australian mouse brain mapping consortium (AMBMC)	GLM, ROI				Male
2019-05-05 12:43:26	777	Marmoset	18	Awake, Anesthesia ventilated	Propofol, Fentanyl, Combinations	7T		GE-EPI	BOLD	Lab made, mrVista	Stimulus-evoked fMRI, Resting-state fMRI	Lab-made	GLM, ROI, Seed-based				Male
2019-05-05 12:47:05	778	Rat Sprague	11	Anesthesia ventilated	Î±-chloralose, Halothane	11.7T		GE	BOLD, CBF		Stimulus-evoked fMRI		GLM				Male
2019-05-05 12:49:58	779	Rhesus	2	Anesthesia free-breathing	Propofol	4.7T		GE-EPI	BOLD	BrainVoyager	Stimulus-evoked fMRI, Deep-brain stimulation fMRI	Lab-made	GLM, ROI				Male
2019-05-05 12:52:02	780	Rat Sprague	10	Anesthesia free-breathing	Isoflurane, Medetomidine, Combinations	7T		GE-EPI	CBV	Stimulate	Stimulus-evoked fMRI		GLM, ROI				Male
2019-05-05 12:55:05	781	Rat Long evans	20	Anesthesia free-breathing	Isoflurane, Ketamine, Combinations, Xylazi ne	9.4T		GE-EPI	BOLD	BrainVoyager	Resting-state fMRI		Seed-based, ICA				Male
2019-05-05 12:57:49	782	Rat Sprague		Anesthesia free-breathing	Medetomidine	9.4T					Resting-state fMRI
2019-05-05 16:05:25	783	Rat Sprague		Anesthesia free-breathing	Medetomidine	7T		GE-EPI	BOLD	FSL	Resting-state fMRI		Seed-based	Non-parametric			Male
2019-05-05 16:07:42	784	Rhesus	2	Awake		3T or less		GE-EPI	BOLD	SPM	Stimulus-evoked fMRI	Lab-made	GLM, ROI				Male
2019-05-05 16:10:49	785	Rat Sprague	15	Anesthesia ventilated	Î±-chloralose	3T or less		GE-EPI	BOLD	SPM, MedX	Pharma fMRI		GLM, ROI				Male
2019-05-05 16:13:50	786	Mouse Black6	28	Anesthesia free-breathing	Medetomidine	4.7T		DWI	diffusion	Lab made	Stimulus-evoked fMRI		ROI				Female
2019-05-05 16:18:56	787	Mouse Black6	29	Anesthesia free-breathing	Medetomidine	11.7T		GE-EPI	BOLD	STIMULATE	Stimulus-evoked fMRI		GLM, ROI				Male
2019-05-05 16:20:46	788	Dog	13	Awake		3T or less		GE-EPI	BOLD	AFNI	Stimulus-evoked fMRI		GLM, ROI				Both
2019-05-05 16:25:43	789	Rat Long evans	48	Anesthesia free-breathing	Isoflurane	4.7T		GE-EPI, ASL	BOLD, CBF	SPM	Resting-state fMRI	RAT Schweinhardt 2003	ICA, Network analysis				Both
2019-05-05 16:29:13	790	Rhesus	3	Anesthesia ventilated	Isoflurane, Fentanyl, Combinations	4.7T		GE-EPI	BOLD	Lab made	Stimulus-evoked fMRI		GLM				Male
2019-05-05 16:32:27	791	Rat other	30	Anesthesia free-breathing	Medetomidine	9.4T		GE-EPI	BOLD	Lab made	Opto fMRI		GLM, ROI				Female
2019-05-05 16:38:02	792	Rat Sprague	13	Anesthesia ventilated	Î±-chloralose	3T or less		GE-EPI	BOLD, CBV		Stimulus-evoked fMRI		GLM, ROI				Male
2019-05-05 16:41:08	793	Mouse Black6	14	Anesthesia ventilated	Isoflurane, Medetomidine, Combinations	9.4T		ME-EPI	BOLD	AFNI, ANTS	Resting-state fMRI	MOUSE Australian mouse brain mapping consortium (AMBMC)	Seed-based, ICA, Network analysis			public repository	Female
2019-05-05 16:44:04	794	Rat Winstar	13	Anesthesia free-breathing	Medetomidine	7T		SE-EPI	diffusion	SPM	Pharma fMRI		GLM, ROI				Male
2019-05-05 17:58:57	795	Rat Sprague	7	Anesthesia ventilated	Isoflurane, Medetomidine	7T		GE-EPI	BOLD, CBV	SPM	Opto fMRI	RAT Schwarz	GLM, ROI				Female
2019-05-05 18:12:54	796	Rat other	10	Anesthesia ventilated	Isoflurane	4.7T		GE-EPI	BOLD	AFNI, Lab made	Deep-brain stimulation fMRI	Lab-made	GLM, ROI				Male
2019-05-05 18:13:24	797														NA
2019-05-05 18:15:25	798	Mouse Black6	32	Anesthesia ventilated	Isoflurane, Medetomidine, Combinations	9.4T		GE-EPI	BOLD	FSL	Resting-state fMRI	Lab-made	ICA, dual-regression	Non-parametric		public repository	Female
2019-05-05 18:18:27	799	Rat Winstar	6	Awake, Anesthesia ventilated	Î±-chloralose	7T		GE	BOLD	Lab made, MEDx	Stimulus-evoked fMRI		GLM
2019-05-05 18:21:19	800	Rat Winstar	60	Anesthesia free-breathing	Halothane	4.7T		RARE	CBV	Lab made	Pharma fMRI		GLM		NA		Male
5/20/2019 13:21:34	802	Rat Sprague	29	Anesthesia ventilated	Î±-chloralose, Urethane	14T or more		GE-EPI, bSSFP	BOLD	AFNI	Stimulus-evoked fMRI	Lab-made	GLM, ROI
5/20/2019 13:36:36	803	Rhesus	35	Anesthesia ventilated	Isoflurane	3T or less		GE-EPI	BOLD	SPM, FSL	Stimulus-evoked fMRI	MACAQUE 112RM-SL template Saleem and logothetis	Seed-based, Network analysis				Both
5/20/2019 13:39:41	804	Rhesus	3	Awake		3T or less		GE-EPI	BOLD	AFNI, Freesurfer	Stimulus-evoked fMRI		GLM, ROI				Male
5/20/2019 14:03:02	805	Rat Sprague	8	Anesthesia ventilated	Î±-chloralose	11.7T		GE-EPI	BOLD	Lab made	Stimulus-evoked fMRI		GLM, ROI				Male
5/20/2019 14:09:50	806	Rat Sprague	14	Anesthesia ventilated	Medetomidine, Î±-chloralose	9.4T		SE + GE	BOLD, CBV	Lab made, Bioimage	Stimulus-evoked fMRI		ROI				Male
5/20/2019 14:19:51	807	Rat Winstar	24	Anesthesia free-breathing	Urethane	9.4T		SE-EPI	BOLD	SPM	Pharma fMRI		GLM, ICA				Male
5/20/2019 14:22:46	808	Rhesus	2	Awake		3T or less		GE-EPI	CBV	Lab made	Stimulus-evoked fMRI		ROI				Male
5/20/2019 14:25:12	809	Rat Sprague	11	Anesthesia ventilated	Î±-chloralose	9.4T		GE-EPI	BOLD, CBV	Lab made	Stimulus-evoked fMRI		GLM, ROI				Male
5/20/2019 14:27:24	810	Rat Sprague		Anesthesia ventilated	Î±-chloralose	9.4T		GE-EPI, SE-EPI	BOLD	Lab made, Bioimage	Stimulus-evoked fMRI	RAT Calabrese 2013	GLM, ROI				Male
5/20/2019 14:30:34	811	Rat Sprague	36	Anesthesia free-breathing	Medetomidine	7T		GE-EPI	BOLD	SPM	Resting-state fMRI		ALFF				Male
5/20/2019 14:41:06	812	Rat Sprague	37	Anesthesia free-breathing	Medetomidine	9.4T		GE-EPI	BOLD		Resting-state fMRI	RAT Schwarz	Graph theory				Male
5/20/2019 14:45:03	813	Starling	9	Anesthesia free-breathing	Medetomidine, Ketamine, Combinations	7T		FSE	BOLD	SPM	Stimulus-evoked fMRI	BIRD De Groof 2016	GLM				Male
5/20/2019 14:47:48	814	Rhesus	10								Resting-state fMRI				NA		Male
5/20/2019 14:48:30	815														NA
5/20/2019 14:50:49	816	Rat Winstar	44	Anesthesia free-breathing	Isoflurane	9.4T		GE-EPI	BOLD		Stimulus-evoked fMRI		GLM, ROI				Both
5/20/2019 15:04:11	817	Rhesus	3	Awake restrained		3T or less		GE-EPI	BOLD	AFNI	Stimulus-evoked fMRI		GLM				Male
5/20/2019 15:27:23	818	Rat Sprague	8	Anesthesia free-breathing	Isoflurane	7T		SE-EPI	BOLD	Stimulate	Stimulus-evoked fMRI		GLM, ROI				Male
5/20/2019 15:32:54	819	Rat Sprague	20	Anesthesia free-breathing	Isoflurane	4.7T		GE-EPI	BOLD, CBF	STIMULATE	Stimulus-evoked fMRI		ROI				Male
5/20/2019 15:35:04	820	Mouse other	20	Anesthesia free-breathing	Isoflurane	9.4T		SE-EPI	BOLD		Stimulus-evoked fMRI
5/20/2019 15:37:59	821	Rat Sprague	18	Anesthesia free-breathing	Isoflurane, Î±-chloralose	4.7T		GE-EPI	BOLD	BrainVoyager	Stimulus-evoked fMRI	Lab-made	GLM
5/20/2019 15:40:25	822	Rhesus		Awake restrained		7T		GE-EPI	BOLD	Lab made	Stimulus-evoked fMRI
5/20/2019 15:47:08	823	Rhesus	3	Awake restrained		3T or less		GE-EPI	BOLD, CBV	SPM, Freesurfer	Stimulus-evoked fMRI		GLM, ROI				Male
5/20/2019 16:10:46	824	Rhesus	2	Awake restrained		3T or less		GE-EPI	BOLD	Freesurfer	Stimulus-evoked fMRI		GLM				Male
5/20/2019 16:13:13	825	Rhesus	3	Awake restrained		3T or less		GE-EPI	CBV		Stimulus-evoked fMRI	MACAQUE MNI Frey 2011	GLM				Both
5/20/2019 16:16:19	826	Other Monkey	8	Anesthesia ventilated	Fentanyl	4.7T		GE-EPI	BOLD, CBV	Lab made	Stimulus-evoked fMRI		GLM				Both
5/20/2019 16:19:43	827	Rat Long evans	12	Anesthesia free-breathing	Isoflurane	7T		GE-EPI	BOLD	FSL, ANTS	Stimulus-evoked fMRI	Lab-made	GLM, ROI				Male
5/20/2019 16:24:46	828	Rhesus	2	Awake		4.7T		GE-EPI	BOLD		Resting-state fMRI		ICA
5/20/2019 16:27:51	829	Rhesus	2	Awake		3T or less		GE-EPI	BOLD		Stimulus-evoked fMRI	macaque F6	GLM, ROI				Male
5/20/2019 16:30:47	830	Rhesus	4	Awake		3T or less		GE-EPI	CBV	SPM	Stimulus-evoked fMRI	MACAQUE M12 Ekstrom 2008	GLM				Male
5/20/2019 16:33:56	831	Rhesus	6	Anesthesia ventilated	Fentanyl	4.7T		GE-EPI	BOLD	SPM, Lab made	Stimulus-evoked fMRI		GLM				Both
5/20/2019 16:35:44	832	Rhesus	6	Anesthesia ventilated	Fentanyl	4.7T		GE-EPI, SE-EPI	BOLD	Lab made	Stimulus-evoked fMRI		GLM, ROI
5/20/2019 16:38:12	833	Marmoset		Awake restrained		9.4T		GE-EPI	BOLD	AFNI	Stimulus-evoked fMRI		GLM, ROI
5/20/2019 16:38:54	834														NA
5/20/2019 16:41:16	835	Rhesus	2	Awake		3T or less		GE-EPI	CBV		Stimulus-evoked fMRI	MACAQUE Saleemâ€“Logothetis	GLM, ROI
5/20/2019 16:44:13	836	Rat Sprague	8	Anesthesia ventilated	Î±-chloralose	7T		GE-EPI	BOLD, CBV		Stimulus-evoked fMRI		GLM				Male
5/20/2019 16:46:18	837	Rhesus	3	Awake restrained		3T or less		GE-EPI	BOLD	AFNI	Resting-state fMRI	MACAQUE McLaren 2009					Female
5/20/2019 16:50:48	838	Rat Winstar	31	Anesthesia ventilated	Isoflurane	9.4T		GE-EPI	BOLD	FSL, ANTS	Resting-state fMRI, Pharma fMRI	Lab-made	Seed-based, Network analysis, Graph theory				Male
5/20/2019 16:54:25	839	Rat Sprague		Anesthesia ventilated	Isoflurane	4.7T		MGE	CBV	AFNI	Pharma fMRI	Lab-made	GLM, ROI
5/20/2019 16:58:09	840	Rat Winstar		Anesthesia free-breathing	chloral hydrate	7T		RARE	BOLD		Pharma fMRI		ROI				Male
5/20/2019 17:01:49	841	Rat Sprague	7	Anesthesia ventilated	Propofol	9.4T		GE-EPI	BOLD	FSL, AFNI	Resting-state fMRI	Lab-made	Seed-based				Male
5/20/2019 17:04:01	842	Mouse other	18	Anesthesia free-breathing	Medetomidine	7T		GE-EPI	BOLD	SPM	Resting-state fMRI	Lab-made	Seed-based, Network analysis				Male
5/20/2019 17:06:33	843	Pig	13	Anesthesia ventilated	Ketamine, Combinations, Midazolam	3T or less		GE-EPI	BOLD	Lab made	Pharma fMRI		GLM				Female
5/24/2019 9:30:28	844	Rat Sprague	18	Awake		4.7T		FSE	BOLD		Pharma fMRI		GLM, ROI				Female
5/24/2019 9:37:18	845	Rat Sprague	36	Anesthesia ventilated	Isoflurane	9.4T		FGE	BOLD	Lab made	Pharma fMRI		GLM, ROI				Male
5/24/2019 9:41:06	846	Rhesus	4	Awake		3T or less		GE-EPI	BOLD		Resting-state fMRI	MACAQUE WBB47 van den Heuvel et al., 2015a	Network analysis
5/24/2019 9:44:36	847	Rhesus	5	Anesthesia ventilated	Fentanyl			GE-EPI	BOLD		Stimulus-evoked fMRI		GLM, ROI
5/24/2019 9:49:00	848	Mouse Black6		Anesthesia free-breathing	Isoflurane	11.7T		FGE	BOLD	AFNI	Stimulus-evoked fMRI		GLM, ROI				Female
5/24/2019 9:53:36	849	Rat Sprague	16	Anesthesia free-breathing	Isoflurane, Medetomidine	9.4T		GE-EPI	BOLD	SPM, Lab made	Resting-state fMRI						Male
5/24/2019 9:57:06	850	Rat Sprague	8	Anesthesia ventilated	pentothal	4.7T		GE	BOLD	MRVision	Deep-brain stimulation fMRI		GLM, ROI				Male
5/24/2019 9:59:38	851														NA
5/24/2019 10:04:04	852	Rhesus	2	Anesthesia ventilated	sevoflurane	3T or less		GE-EPI	BOLD	SPM	Stimulus-evoked fMRI		GLM, ROI				Male
5/24/2019 10:08:11	853	Mouse other	36	Anesthesia free-breathing	Isoflurane	11.7T		GE-EPI	BOLD	AFNI	Resting-state fMRI	Lab-made	Seed-based				Both
5/24/2019 10:13:08	854	Rat Sprague	8	Anesthesia ventilated	Fentanyl, Combinations, Halothane	3T or less		GE	BOLD		Pharma fMRI		ROI
5/24/2019 10:15:49	855	Rhesus	8	Awake		3T or less		GE-EPI	CBV	SPM	Stimulus-evoked fMRI		GLM				Both
5/24/2019 10:19:02	856	Rhesus	5	Anesthesia ventilated	Isoflurane, Fentanyl, Combinations	4.7T		GE-EPI	BOLD	BrainVoyager	Stimulus-evoked fMRI		GLM, ROI
5/24/2019 10:20:36	857	Rhesus	2	Awake		3T or less		GE-EPI	CBV	SPM, Freesurfer	Stimulus-evoked fMRI		GLM				Male
5/24/2019 10:24:07	858	Rhesus	3	Awake		3T or less		GE-EPI	CBV	SPM	Stimulus-evoked fMRI	Lab-made	GLM				Male
5/24/2019 10:26:33	859	Squirrel Monkey	6	Anesthesia free-breathing	Ketamine, Combinations, xylazine	3T or less		GE-EPI	BOLD	SPM	Stimulus-evoked fMRI	Lab-made	GLM, ROI				Male
5/24/2019 10:30:32	860	Mouse Black6		Anesthesia ventilated	Isoflurane	9.4T		GE-EPI	BOLD, CBV		Pharma fMRI		ROI				Female
5/24/2019 10:35:07	861	Rat Sprague	24	Awake		4.7T		FSE	BOLD	Lab made	Pharma fMRI		GLM, ROI				Female
5/24/2019 10:49:31	862	Rhesus	2	Awake		4.7T		GE-EPI	CBV	AFNI, Lab made	Stimulus-evoked fMRI	Lab-made	GLM				Female
5/24/2019 10:55:19	863	Rat Sprague	80	Anesthesia ventilated	Isoflurane	4.7T		RARE	CBV	FSL	Pharma fMRI	Lab-made	GLM, ROI				Male
5/24/2019 11:00:25	864	Rat other	18	Anesthesia free-breathing	Isoflurane	9.4T		GE-EPI	BOLD	SPM	Stimulus-evoked fMRI		GLM, ROI				Female
5/24/2019 11:01:26	865										Stimulus-evoked fMRI				NA
5/24/2019 11:04:21	866	Rat Sprague	20	Anesthesia ventilated	Urethane, pentobarbital	3T or less		GE-EPI	BOLD	AFNI	Stimulus-evoked fMRI		GLM, ROI				Male
5/24/2019 11:10:00	867	Rat other	22								Opto fMRI				NA
5/24/2019 11:12:17	868	Squirrel Monkey	3	Anesthesia ventilated	Isoflurane	9.4T		GE-EPI	CBV	Lab made	Stimulus-evoked fMRI	Lab-made	GLM, ROI				Male
5/24/2019 11:14:34	869	Mouse other	6	Anesthesia free-breathing	Isoflurane	9.4T		GE-EPI	BOLD		Resting-state fMRI		Seed-based				Male
5/24/2019 11:16:07	870	bird starling	12	Anesthesia free-breathing	Medetomidine, Ketamine, Combinations	9.4T		FLASH	BOLD	MEDx	Stimulus-evoked fMRI		GLM, ROI				Male
5/24/2019 11:18:29	871	Rhesus	5	Anesthesia ventilated	Isoflurane, Fentanyl, Combinations	4.7T		GE-EPI	BOLD	BrainVoyager	Stimulus-evoked fMRI		GLM, ROI
5/24/2019 11:19:45	872	Rhesus	2	Anesthesia ventilated	Fentanyl	4.7T		GE-EPI	BOLD	Lab made	Stimulus-evoked fMRI		GLM, ROI
5/24/2019 11:23:06	873	Rat Long evans	40	Anesthesia ventilated	Propofol	9.4T		FLASH	CBV	AFNI	Stimulus-evoked fMRI	Lab-made	GLM, ROI				Male
5/24/2019 11:25:31	874	Rat Sprague	22	Anesthesia ventilated	Isoflurane	7T		GE-EPI	BOLD	SPM		Lab-made	Seed-based, ICA				Female
5/24/2019 11:54:41	875	Octopus									Stimulus-evoked fMRI				NA		Female
5/24/2019 11:58:00	876	Rat Sprague	14	Anesthesia ventilated	Î±-chloralose	11.7T		GE-EPI	BOLD		Stimulus-evoked fMRI		GLM, ROI				Male
5/24/2019 11:59:31	877	Rat Sprague		Anesthesia free-breathing	Isoflurane	4.7T		RARE	BOLD		Stimulus-evoked fMRI		ROI				Male
5/24/2019 12:00:17	878										Stimulus-evoked fMRI				NA
5/24/2019 12:02:38	879	Rat Sprague	24	Anesthesia free-breathing	Medetomidine	9.4T		GE-EPI	BOLD	FSL	Stimulus-evoked fMRI	Lab-made	GLM, ROI
5/24/2019 12:04:18	880	Mouse Black6	12	Anesthesia free-breathing	Isoflurane	7T			BOLD	FSL, AFNI	Resting-state fMRI	Lab-made	Seed-based				Male
5/24/2019 12:05:45	881	Rat Sprague	10	Anesthesia ventilated	Isoflurane	7T		GE-EPI	BOLD	SPM	Stimulus-evoked fMRI	Lab-made	GLM, ROI				Male
5/24/2019 12:07:46	882	Rat Sprague	22	Anesthesia ventilated	Isoflurane	4.7T		RARE	CBV	STIMULATE	Stimulus-evoked fMRI		GLM, ROI				Male
5/24/2019 12:57:59	883	Rabbit	5	Awake		4.7T		GE-EPI	BOLD	Lab made	Stimulus-evoked fMRI		GLM, ROI				Female
5/24/2019 12:59:34	884	Rat Sprague	22	Anesthesia ventilated	Isoflurane	7T		GE-EPI	BOLD	SPM	Stimulus-evoked fMRI	Lab-made	GLM, ROI				Male
5/24/2019 13:00:52	885	Mouse Black6	17	Anesthesia ventilated	halothane	7T		GE-EPI	BOLD, CBV		Resting-state fMRI	Lab-made	Seed-based, ICA, Network analysis				Male
5/24/2019 13:04:50	886	Rat Sprague	28	Awake		4.7T		FSE	BOLD	Stimulate	Stimulus-evoked fMRI		GLM				Female
5/24/2019 13:07:32	887	Rat Winstar	13	Anesthesia free-breathing	Medetomidine	3T or less		GRE	BOLD	Lab made	Stimulus-evoked fMRI		GLM, ROI				Female
5/24/2019 13:09:59	888	Rat Sprague	12	Anesthesia free-breathing	Urethane	4.7T		GRE	BOLD	Stimulate	Deep-brain stimulation fMRI		ROI				Male
5/24/2019 13:10:44	889														NA
5/24/2019 13:14:02	890	Dog	12	Awake		3T or less		GE-EPI	BOLD	AFNI	Stimulus-evoked fMRI		GLM, ROI
5/24/2019 13:27:14	891	Rat Sprague	36	Anesthesia free-breathing	Halothane	4.7T, 9.4T		GE-EPI	CBV		Stimulus-evoked fMRI	Lab-made	GLM				Male
5/24/2019 13:30:03	892	Rhesus	2	Awake		3T or less		GE-EPI	CBV	Freesurfer, Lab made	Stimulus-evoked fMRI		GLM, ROI				Male
5/24/2019 13:33:04	893	Rat Winstar	28	Anesthesia free-breathing	Urethane	7T		GE-EPI	BOLD	SPM	Stimulus-evoked fMRI	Lab-made	GLM, ROI				Male
5/24/2019 13:38:28	894	Rat Sprague	27	Awake		4.7T		GE-EPI	BOLD	FSL, AFNI	Resting-state fMRI	Lab-made	Seed-based, Network analysis, Graph theory				Female
5/24/2019 13:41:48	895	Rhesus	2	Awake		3T or less		GE-EPI	CBV		Stimulus-evoked fMRI		GLM				Male
5/24/2019 13:44:42	896	Rhesus	11	Anesthesia free-breathing	Isoflurane			GE-EPI	BOLD		Resting-state fMRI	MACAQUE F99 atlas template	Seed-based
5/24/2019 13:50:48	897	Other Monkey	13	Anesthesia ventilated	Ketamine	3T or less		GE-EPI	BOLD	FSL	Resting-state fMRI	Lab-made	ICA, dual-regression				Both
5/24/2019 13:55:15	898	Other Monkey	8	Anesthesia ventilated	Isoflurane	3T or less		GE-EPI	BOLD	FSL	Stimulus-evoked fMRI	MACAQUE MNI	GLM				Female
5/24/2019 13:57:55	899	Rhesus	4	Awake		3T or less		GE-EPI	CBV	AFNI	Stimulus-evoked fMRI		GLM, ROI			contact author	Both
5/24/2019 14:00:40	900	Cat	3	Anesthesia ventilated	Isoflurane	4.7T		GE-EPI	BOLD		Stimulus-evoked fMRI		GLM, ROI
5/24/2019 14:04:28	901	Rat Winstar	9	Anesthesia ventilated	Isoflurane	9.4T		SE-EPI	BOLD	Lab made	Stimulus-evoked fMRI, Resting-state fMRI		GLM, ROI, Seed-based				Male
5/24/2019 14:07:55	902	Rat Sprague	14	Anesthesia free-breathing	Isoflurane	7T		SE-EPI	BOLD	SPM, STIMULATE	Stimulus-evoked fMRI		GLM, ROI				Female
5/24/2019 14:12:36	903	Mouse Black6	16	Anesthesia free-breathing	Medetomidine	7T		GE-EPI	BOLD	SPM	Resting-state fMRI	MOUSE Allen Institute for Brain Science (AIBS)	ICA, Network analysis, Graph theory				Female
5/24/2019 14:15:47	9004	Rhesus	2	Anesthesia ventilated	Isoflurane, Fentanyl, Combinations	4.7T		GE-EPI	BOLD	Lab made	Stimulus-evoked fMRI		GLM, ROI
5/24/2019 14:16:22	905														NA
5/24/2019 14:18:27	906	Rhesus	3	Awake		3T or less		GE-EPI	CBV	SPM	Stimulus-evoked fMRI	MACAQUE 112-RM McLaren 2009	GLM				Both
5/24/2019 14:21:34	907	Rat Sprague	5	Anesthesia ventilated	pentobarbital	3T or less		GE-EPI	BOLD	AFNI	Stimulus-evoked fMRI		GLM, ROI				Male
5/24/2019 14:24:30	908														NA
5/24/2019 14:27:16	909	Pigeon	8	Anesthesia free-breathing	Isoflurane	7T		GE-EPI	BOLD	SPM	Resting-state fMRI		Seed-based, ICA				Both
5/24/2019 14:30:00	910	Rhesus	5	Awake, Anesthesia ventilated	Fentanyl	7T		SE-EPI	BOLD	SPM	Stimulus-evoked fMRI	MACAQUE McLaren	GLM				Male
5/24/2019 15:17:12	911	Rhesus	4	Awake		3T or less		GE-EPI	BOLD	SPM	Stimulus-evoked fMRI	MACAQUE 112-RM	GLM				Male
5/24/2019 15:17:56	912														NA
5/24/2019 15:22:35	913	Rhesus	2	Awake		3T or less		GE-EPI	BOLD		Opto fMRI		GLM
5/24/2019 15:24:49	914	Rat Sprague		Anesthesia free-breathing	Urethane	7T		FLASH	BOLD	Lab made	Stimulus-evoked fMRI		GLM, ROI				Male
5/24/2019 15:28:05	915	Squirrel Monkey	6	Anesthesia ventilated	Isoflurane	9.4T		GE-EPI	BOLD	Lab made	Stimulus-evoked fMRI		GLM
5/24/2019 15:31:56	916	Rat other	27	Anesthesia free-breathing	Medetomidine	9.4T		GE-EPI	BOLD	SPM	Stimulus-evoked fMRI, Opto fMRI		GLM, ROI				Female
5/24/2019 15:35:42	917	Rat other	38	Anesthesia free-breathing	Isoflurane, Medetomidine	9.4T		GE-EPI	BOLD	SPM	Pharma fMRI	Lab-made	GLM, ROI, Network analysis				Male
5/24/2019 15:39:17	918	Rat Sprague	8	Anesthesia free-breathing	Isoflurane	7T		GE-EPI	BOLD	Stimulate	Stimulus-evoked fMRI		GLM, ROI				Male
5/24/2019 15:41:56	919	Cat	6	Anesthesia ventilated	Isoflurane	9.4T		SE-EPI	CSF	STIMULATE	Stimulus-evoked fMRI		GLM				Female
5/24/2019 15:44:20	920	Rat other	24	Anesthesia free-breathing	Urethane	4.7T		GE	BOLD	SPM	Pharma fMRI	Lab-made	GLM
5/24/2019 16:25:48	921	Rhesus	4	Anesthesia ventilated	Fentanyl	4.7T		GE-EPI	BOLD	Lab made	Stimulus-evoked fMRI		GLM
5/24/2019 16:27:50	922	Cat	9	Anesthesia ventilated	Isoflurane	4.7T		GE-EPI	BOLD	MedX	Pharma fMRI		GLM, ROI				Both
5/24/2019 16:31:15	923	Rat other	15	Anesthesia free-breathing	Medetomidine	7T		GE-EPI	BOLD	FSL	Resting-state fMRI	RAT Valdes-hernandez	Network analysis, Graph theory
5/24/2019 16:33:42	924	Rhesus	2	Awake		3T or less		GE-EPI	BOLD	SPM	Stimulus-evoked fMRI		GLM
5/24/2019 16:36:10	925	Rat Sprague	5	Anesthesia free-breathing	Isoflurane	3T or less		GE	BOLD, CBV		Pharma fMRI	Lab-made	GLM, ROI				Male
5/24/2019 16:40:36	927	Rhesus	5	Anesthesia ventilated	Isoflurane	3T or less		GE-EPI, pCASL	BOLD, CBF	FSL, AFNI, Lab made	Resting-state fMRI		Seed-based				Female
5/24/2019 16:48:10	928	Rhesus	2	Awake, Anesthesia free-breathing	Medetomidine	4.7T		GE-EPI	BOLD	SPM	Stimulus-evoked fMRI, Resting-state fMRI	Lab-made	GLM, ROI, Network analysis, Graph theory
5/24/2019 16:48:49	929														NA
5/24/2019 16:49:18	930														NA
5/24/2019 16:52:29	931	Rhesus	2	Awake		4.7T		GE-EPI	CBV	AFNI	Stimulus-evoked fMRI	Lab-made	GLM, ROI				Both
5/24/2019 16:57:10	932	Mouse other	29	Anesthesia free-breathing	Medetomidine	7T		GE-EPI	BOLD	SPM	Opto fMRI	Lab-made	GLM, ROI				Both
5/24/2019 17:04:28	934	Rhesus	3	Awake		3T or less		GE-EPI	BOLD	AFNI, Freesurfer, Lab made	Opto fMRI		GLM, ROI
5/24/2019 17:00:19	933	Rat other	22	Anesthesia free-breathing	Urethane	7T		GE-EPI	BOLD	SPM	Deep-brain stimulation fMRI	RAT Schweinhardt	GLM, ROI				Male
5/24/2019 17:07:32	935	Rhesus	3	Awake							Deep-brain stimulation fMRI		GLM
5/24/2019 17:11:58	936	Mouse Black6	20	Awake		9.4T		GE-EPI	BOLD	AFNI	Opto fMRI	Mouse MacKenzie-Graham 2006	GLM, ROI				Female
5/24/2019 17:15:52	937	Rat Sprague	6	Anesthesia free-breathing	Î±-chloralose	9.4T		SE-EPI	BOLD	SPM, FSL	Stimulus-evoked fMRI		GLM, ROI				Male
5/24/2019 17:20:08	939	Rhesus	4	Awake		3T or less					Stimulus-evoked fMRI		GLM				Male
5/24/2019 17:20:26	940														NA
5/24/2019 17:21:19	941										Stimulus-evoked fMRI				NA
5/24/2019 17:25:16	942	Rat Sprague	26	Anesthesia free-breathing	Urethane	11.7T		GE-EPI	BOLD	AFNI	Resting-state fMRI	Lab-made	Seed-based, ALFF				Male
5/24/2019 17:27:50	943	Rat Sprague	7	Anesthesia free-breathing	Isoflurane	9.4T		GE-EPI	BOLD		Resting-state fMRI		Seed-based, ALFF				Male
5/24/2019 17:34:19	944	Rat Sprague	30	Anesthesia ventilated	Urethane	3T or less		GE-EPI	BOLD	AFNI	Pharma fMRI	Lab-made	GLM, ROI				Male
5/24/2019 17:38:15	945	Rhesus	7	Anesthesia ventilated	Fentanyl	4.7T		GE-EPI	BOLD	Brainvoyager	Stimulus-evoked fMRI		GLM, ROI				Both
5/24/2019 17:40:51	946	Rat Sprague	11	Anesthesia free-breathing	Medetomidine	9.4T		GE-EPI	BOLD	Lab made	Resting-state fMRI		Seed-based, ALFF, dFC				Male
5/24/2019 17:42:56	947	Cat	5	Anesthesia ventilated	Isoflurane	9.4T		GE-EPI	BOLD	STIMULATE,	Stimulus-evoked fMRI		GLM, ROI
5/24/2019 17:45:31	948	Mouse Black6, Mouse other	45	Anesthesia free-breathing	Isoflurane, Medetomidine	9.4T		GE-EPI	BOLD	SPM	Resting-state fMRI	Lab-made	ICA, Network analysis				Male
5/24/2019 17:48:35	949	Rat Sprague	15	Awake, Anesthesia free-breathing	Isoflurane	4.7T		GE-EPI	BOLD, CBF	STIMULATE	Stimulus-evoked fMRI		GLM, ROI
5/24/2019 17:52:57	950	Rat Long evans		Anesthesia free-breathing	Medetomidine	4.7T		GE-EPI	BOLD	BrainVoyager	Opto fMRI		GLM, ROI
